1           **Budding yeast chromatin is dispersed in a crowded nucleoplasm *in vivo***

2

3           Chen Chen<sup>1</sup>, Hong Hwa Lim<sup>2,3</sup>, Jian Shi<sup>1</sup>, Sachiko Tamura<sup>4</sup>, Kazuhiro Maeshima<sup>4</sup>,

4                                           Uttam Surana<sup>2,3,5</sup> and Lu Gan<sup>1\*</sup>

5

6           <sup>1</sup> Department of Biological Sciences and Centre for Bioluminescence Sciences, National

7           University of Singapore, Singapore 117543

8           <sup>2</sup> Institute of Molecular and Cell Biology, Agency for Science Technology and Research,

9           Proteos, 61 Biopolis Drive, Singapore 138673

10          <sup>3</sup> Bioprocessing Technology Institute, 20 Biopolis Way, Singapore 138668

11          <sup>4</sup> National Institute of Genetics and Sokendai (Graduate University for Advanced

12          Studies), Mishima, Shizuoka, Japan 411-8540

13          <sup>5</sup> Department of Pharmacology, National University of Singapore, Singapore 117543

14          \* Correspondence: [lu@anaphase.org](mailto:lu@anaphase.org)

15          Phone: +65 6516 8868

16

17          **Running title: Cryo-ET of budding yeast chromatin**

18 **Abstract**

19 Chromatin organization has an important role in the regulation of eukaryotic  
20 systems. While recent studies have refined the 3-D models of chromatin organization  
21 with high resolution at the genome sequence level, little is known about how the most  
22 fundamental units of chromatin – nucleosomes – are positioned in 3-D *in vivo*. Here we  
23 have used electron cryotomography to study chromatin organization in the budding  
24 yeast *S. cerevisiae*. Direct visualization of yeast nuclear densities shows no evidence of  
25 30-nm chromatin fibers. Aside from pre-ribosomes and spindle microtubules, few  
26 nuclear structures are larger than a tetranucleosome. Yeast chromatin does not form  
27 compact structures in interphase or mitosis and is consistent with being in an “open”  
28 configuration that is conducive to high levels of transcription. In the absence of higher-  
29 order chromatin packing, we propose that yeast can regulate its transcription using local  
30 nucleosome-nucleosome associations.

## 31 Introduction

32 Eukaryotic nuclear DNA is packaged to 1/10,000<sup>th</sup> of its contour length but must  
33 remain accessible to intranuclear machinery. The nucleosome is the first level of  
34 chromatin organization: 146 bp of double-stranded DNA wraps around a histone  
35 octamer that is composed of two copies each of histones H2A, H2B, H3 and H4 (Luger  
36 et al., 1997). Chromatin organization beyond the nucleosome has been intensively  
37 studied for nearly half a century. One notable traditional-electron microscopy (EM) study  
38 of purified chromatin proposed that sequential nucleosomes are arranged into compact  
39 ~30-nm-diameter helical fibers (hereon referred to as chromatin fibers because the  
40 dimensions are variable) (Finch and Klug, 1976). Further studies proposed at least two  
41 broad classes of fiber models: the one-start solenoid (Robinson et al., 2006) and the  
42 two-start zigzag (Schalch et al., 2005; Song et al., 2014). In these fiber models, the  
43 nucleosomes pack so close that the fiber takes on the appearance of a discrete particle.  
44 The majority of these chromatin studies, however, were done *in vitro* at low ionic  
45 strength, making it unclear if the resultant models reflect chromatin organization in the  
46 crowded metabolically active interior of a cell's nucleus (Maeshima et al., 2010;  
47 Maeshima et al., 2016).

48 While traditional EM has revealed the overall organization of purified chromatin  
49 (Finch et al., 1975; Olins and Olins, 1974), it has provided limited insights into chromatin  
50 structure *in vivo* because macromolecular structure is highly sensitive to sample-  
51 preparation parameters: buffer conditions, chemical fixation, dehydration, and heavy-  
52 metal staining (Dubochet et al., 1988; Maeshima et al., 2010). Recently, high-  
53 throughput-sequencing-based chromatin-conformation capture (3C, 5C, Hi-C, etc.;

54 hereon abbreviated 3C) has been used as a complementary method to study chromatin  
55 structure in fixed cells (Dekker et al., 2013; Pombo and Dillon, 2015; Smallwood and  
56 Ren, 2013). These 3C approaches reveal the most probable pair-wise chromatin  
57 contacts from a population of cells. The detected contacts are distance constraints that  
58 can be used to infer 3-D chromatin models. Single-celled 3C is also possible, but the  
59 number of detected contacts is so sparse that the resultant models are limited to larger  
60 higher-order structures like topologically associating domains (Nagano et al., 2013).  
61 Due to the dynamic nature of cells, 3C models are also susceptible to potential biases in  
62 nucleosome accessibility and fixation artifacts.

63       Electron cryomicroscopy (cryo-EM) permits the direct visualization of  
64 macromolecular densities in a near-native state. Furthermore, cryo-EM can provide  
65 relatively “non-invasive” windows on how macromolecular complexes interact inside of  
66 organelles and cells. For example, cryo-EM studies of vitreous sections showed that in  
67 isolated chicken-erythrocyte nuclei and partially lysed starfish and sea cucumber sperm,  
68 chromatin is condensed into 30-nm fibers (Scheffer et al., 2011; Woodcock, 1994). In  
69 contrast, studies of vitreous sections of intact HeLa and CHO cells did not reveal  
70 evidence of the 30-nm chromatin fibers (Eltsov et al., 2008; McDowall et al., 1986);  
71 instead, nucleosome densities were packed in an irregular state akin to the polymer-  
72 melt-like structure model (Maeshima et al., 2014b). Electron spectroscopic imaging of  
73 mouse cells also did not reveal any chromatin fibers (Fussner et al., 2012). Electron  
74 cryotomography (cryo-ET), which allows 3-D reconstructions of cells in a life-like state  
75 (Gan and Jensen, 2012), showed that marine picoplankton chromatin is also organized  
76 like a polymer-melt (Gan et al., 2013). Despite this growing body of evidence that the

77 chromatin fiber is not the predominant form of chromatin packing, most studies continue  
78 to assume that chromatin packs into fibers *in vivo*. This confusion is also perpetuated  
79 because very few cryo-ET studies have been done on intact model eukaryotic cells.

80         The budding yeast *S. cerevisiae* (hereon referred to as yeast) is an important  
81 model system for chromatin studies. Fluorescence-microscopy imaging of certain  
82 genomic loci (Bystricky et al., 2004) and high-resolution nucleosome-positioning studies  
83 (Brogaard et al., 2012) produced models of yeast chromatin that were consistent with  
84 chromatin fibers. This conclusion is controversial because 3C studies did not detect any  
85 evidence of chromatin fibers (Dekker, 2008; Hsieh et al., 2015). While light-microscopy  
86 and high-throughput sequencing-based approaches have produced important advances  
87 to our understanding of chromatin structure, no study has directly visualized  
88 nucleosomes within the crowded molecular environment of intact yeast.

89         In this work, we directly visualized the nuclear densities of yeast in 3-D using  
90 cryo-ET of vitreous sections. We controlled for sample-preparation artifacts using known  
91 chromatin structures. Our analysis of cryotomograms of G1- and metaphase-arrested  
92 yeast did not uncover any evidence of regular 30-nm chromatin fibers. Instead,  
93 nucleosomes have an irregular organization and do not adopt any higher-order  
94 structures. Nucleosomes do frequently pack close enough to form small clusters. Given  
95 the low frequency of introns in yeast and the nucleosome-occupancy data showing  
96 nucleosome depletion near the transcription start site (Lee et al., 2007), we propose that  
97 some of the small clusters of nucleosomes may in fact contain the coding regions of  
98 genes.

## 99 **Results**

100

### 101 **Chromatin fibers are compact and stable**

102         The diversity of model systems and cryo-EM techniques makes it challenging to  
103 understand what are the most reproducible structural features of chromatin. Purified  
104 chromatin fibers are thin enough that they can be plunge-frozen and immediately  
105 imaged by cryo-EM. Chromatin inside cells cannot be effectively imaged by cryo-EM  
106 unless the cells are first thinned in cryogenic conditions; cryomicrotomy can produce  
107 such vitreous sections (Dubochet et al., 1988). To account for the effects of cryo-EM  
108 sample preparation, we used purified chicken-erythrocyte chromatin fibers as a positive  
109 control (Fig. S1). We stabilized the chromatin fibers in isolation buffer containing 2 mM  
110  $Mg^{2+}$  (Widom, 1989), both with and without cryoprotectant, and then performed cryo-ET  
111 on these samples prepared either by plunge-freezing or by cryomicrotomy (Figs. 1 and  
112 S2). Pairwise comparisons of the resultant cryotomograms lead to the following  
113 conclusions: (1) chromatin fibers are recognizable as compact particles regardless of  
114 sample-preparation technique; (2) these fibers are so compact that it is difficult to  
115 distinguish individual nucleosome densities when the fibers aggregate; (3) in  
116 cryosections, chromatin fibers remain intact and are compressed along the cutting  
117 direction, as expected. Having controlled for the technical aspects of cryo-ET samples,  
118 we next combined cryomicrotomy with automated cryo-ET to image many yeast cells to  
119 ensure that our observations were reproducible (Tables 1 and S1).

120

### 121 **Chromatin does not have long-range order in yeast**

122 In many eukaryotes, chromosomes undergo global reorganization, from an  
123 “open” interphase state to a condensed mitotic state. While it remains controversial how  
124 much yeast mitotic chromatin condenses (see discussion), yeast chromatin might form  
125 more fibers in mitosis than in interphase. To test for this condensation, we arrested cells  
126 at both G1 and metaphase (Fig. S3) and then imaged them by cryo-ET of cryosections.  
127 Nucleosome-like densities were abundant inside the nuclei of both kinds of cells, but  
128 higher-order chromatin structures that resemble fibers or highly compact arrays were  
129 absent (Figs. 2A and 2B and Movie S1; 2C and 2E). In fact, we did not see any  
130 assemblies of nucleosome-sized particles that have long-range order of any kind.  
131 Ribosome-like particles – most likely pre-ribosomes (Tschochner and Hurt, 2003) –  
132 were also present in the nucleus (Figs. 2A and 2B; 2G and 2H). In addition, in  
133 metaphase cells, spindle microtubules, which have a 25-nm diameter, could be seen  
134 inside the nucleus. Visualization of intranuclear macromolecular complexes that of  
135 comparable size to chromatin fibers further demonstrates that our data has enough  
136 contrast to reveal chromatin fibers. In summary, these data show that yeast chromatin  
137 does not have features consistent with chromatin fibers or compact chromatin structures  
138 of any kind, in G1 or metaphase.

139 Fourier analysis is a well-established method to detect the presence densely  
140 packed regular particles like nucleosomes and chromatin fibers (Eltsov et al., 2008;  
141 Scheffer et al., 2011). To detect and characterize any regular motifs that may be  
142 present, we performed Fourier analysis on positions within the nuclei (Figs. 2C and 2E).  
143 A broad peak at ~10-nm spacing stood out in both G1 and metaphase cells (blue plots  
144 in Figs. 2I and 2J). This signal is expected from loosely packed nucleosomes, which are

145 6-nm thick and 11-nm in diameter (Joti et al., 2012; Nishino et al., 2012). In contrast, we  
146 did not observe a peak at ~30-nm spacing, which would be expected of a nucleus that is  
147 enriched with 30-nm chromatin fibers (Scheffer et al., 2011). These observations were  
148 reproducible in all 19 our cryosectioned yeast samples (see Figs. S4A and S4B for  
149 more examples; Table S1).

150 As an internal control, we analyzed the cytoplasm of both G1 and metaphase  
151 cells. Many of these positions are densely packed with ribosomes (Figs. 2D and 2F),  
152 which produced the expected broad peak at ~ 30-nm spacing (red plots in Figs. 2I and  
153 2J). To eliminate even the remotest possibility that the effects of microscope underfocus  
154 conditions caused us to miss the chromatin fibers, we also acquired several tilt series  
155 much closer to focus (Fig. S5). This close-to-focus data did not show any evidence of  
156 chromatin fibers.

157 The high contrast in our best tomograms allowed us to render the nuclear  
158 volumes as isosurfaces so that the nucleosome-like densities could be visualized in 3-D  
159 (Fig. 3). This rendering style enables the direct inspection for 3-D arrangements of  
160 chromatin structures that we might otherwise have missed when inspecting 2-D  
161 “tomographic” slices. As expected, the isosurfaces confirmed the crowded and irregular  
162 nature of the yeast nuclear structures (Figs. 3B, C and 3F, G). This crowdedness was  
163 even more evident when we increased the thickness to 70 nm (Figs. 3D and 3H). In  
164 summary, our cryo-ET data show no evidence that yeast chromatin organizes as fibers  
165 or any periodic higher-order structures *in vivo*.

166

167 **Fixed cells also have disorganized chromatin**



168           A recent study used the new 3C variant called “Micro-C” to study chromatin  
169 structure in formaldehyde-fixed yeast cells (Hsieh et al., 2015). That study concluded  
170 that yeast chromatin does not form chromatin fibers but instead packs into  
171 tetranucleosome clusters. Since 3C approaches are thought to capture native chromatin  
172 interactions, they could inform on our observations if the formaldehyde-fixation step  
173 does not seriously disrupt nuclear structure. We therefore tested if fixed cells are  
174 seriously perturbed and if they have the proposed oligonucleosome structures. We fixed  
175 log-phase wild-type cells (US1363) in formaldehyde using published protocols (Hsieh et  
176 al., 2015) and then high-pressure froze, cryosectioned, imaged, and generated  
177 cryotomograms using the same conditions as for unfixed cells. Overall, we did not see  
178 any gross distortions to cellular morphology except to the mitochondrial membranes  
179 (Fig. 4). Macromolecular complexes such as ribosomes did not form aggregates either.  
180 While the contrast was not as high as in unfixed cells, we could see that the  
181 nucleosome-like densities were still organized irregularly (Fig. 4C). Some nucleosome-  
182 like densities were also close enough to form contacts (Fig. 4D), but we did not see any  
183 highly compacted structures reminiscent of tetranucleosomes in crystals (Schalch et al.,  
184 2005) or in glutaraldehyde-fixed chromatin arrays (Song et al., 2014). These  
185 observations were reproducible in all our fixed yeast samples (see Fig. S4C).

186

### 187 **Local chromatin structure in yeast**

188           If groups of nucleosomes form abundant, well-defined complexes, they must also  
189 appear frequently as clusters of intranuclear densities in our cryotomograms. This  
190 notion has been used in the study of chromatin fibers in chicken erythrocytes (Scheffer

191 et al., 2011), ATPases in mitochondria (Davies et al., 2011), and polysomes in *E. coli*  
192 and neurons (Brandt et al., 2010; Brandt et al., 2009). We could clearly see small  
193 clusters of nucleosome-like densities in many of our best cryotomograms. These  
194 clusters may, for example, be tetranucleosomes, albeit not as densely packed as in the  
195 aforementioned crystal and cryo-EM structures (Robinson et al., 2006; Schalch et al.,  
196 2005; Song et al., 2014). To locate these candidate oligonucleosome structures in a  
197 more objective and automated way, we searched using template matching (Fig. 5A).  
198 Not knowing how exactly the nucleosomes would be positioned next to each other, we  
199 used as references simple clusters of spheres packed to ~10-nm center-to-center  
200 distance (Fig. 5B). Very few template-matching hits looked exactly like the reference  
201 models, further supporting our observation that yeast chromatin is irregular. Of the best-  
202 correlating hits, the positions of the nucleosome-like densities varied so much that  
203 further analysis by subtomogram averaging was not feasible (Fig. 5B). Furthermore,  
204 fewer than ~10 clusters of each “class” could be found in the search volume. If we  
205 extrapolated to the entire yeast nucleus, then there would be fewer than ~1,000 of each  
206 of these classes of oligonucleosome clusters. While it was tempting to template match  
207 with other arrangements of closely packed spheres, many of these would yield  
208 overlapping hits because the clusters share similar motifs (like two nucleosomes in a  
209 row). This analysis shows that while clusters of nucleosomes exist in yeast, they are  
210 arranged in many different configurations.

## 211 **Discussion**

### 212 **Vitreous sections reveal details of *in vivo* chromatin organization**

213 Cryo-ET makes it possible to address structural cell-biology problems at  
214 molecular resolution (Dubrovsky et al., 2015). Limitations imposed by electron-  
215 scattering physics nevertheless have restricted the vast majority of such advances to  
216 bacteria, which are thin enough to be plunge-frozen and then imaged *in toto* (Pilhofer  
217 and Jensen, 2013). Cryo-ET studies of eukaryotes, particularly the investigations of  
218 minimally perturbed chromatin require that intact cells be thinned in the frozen-hydrated  
219 state. This challenge can be surmounted by cryomicrotomy, which can preserve  
220 molecular details in a near-native state (Al-Amoudi et al., 2004). We have now used  
221 cryo-ET of vitreous sections to resolve details of yeast chromatin and have revealed  
222 nucleosome-organizational principles that may inform on how chromatin organization  
223 may influence transcription.

224 Our study reveals that the yeast nucleus is crowded with macromolecular  
225 complexes, without any evidence of chromatin fibers or anything that could be a densely  
226 packed chromatin structure. The absence of periodic chromatin structures in yeast is  
227 reminiscent of the picoplankton *Ostreococcus tauri* (Gan et al., 2013), and HeLa cells  
228 (Mahamid et al., 2016), the only other eukaryotes studied intact by cryo-ET. More cryo-  
229 ET studies of eukaryotes are needed to establish whether chromatin fibers are the  
230 exception or the rule.

231

### 232 **Yeast chromatin does not form condensed structures**

233 Yeast has been studied extensively using EM of fixed and stained cells, but there  
234 was no evidence of mitotic chromosome condensation, perhaps as a result of sample-  
235 preparation artifacts (O'Toole et al., 1999; Robinow and Marak, 1966; Winey et al.,  
236 1995). In contrast, both fluorescence *in situ* hybridization and Lac-operator-array  
237 tagging experiments have shown that distant sequences on the same chromosome  
238 move closer together during mitosis (Guacci et al., 1994; Vas et al., 2007). Cryo-EM of  
239 cryosections can reveal condensed chromosomes like those in metaphase HeLa cells  
240 because the local concentration of nucleosomes increases at positions corresponding to  
241 chromatids (Eltsov et al., 2008). In our cryotomograms of metaphase-arrested cells, we  
242 could not detect any condensed chromosomes. Therefore yeast undergoes mitotic  
243 condensation without increasing local nucleosome concentration. The simplest  
244 explanation is that yeast chromosomes condense by means of looping interactions,  
245 perhaps as proposed by a recent study (Cheng et al., 2015).

246 The Micro-C approach was recently developed to probe the 3C “blind spot”,  
247 making it possible to detect chromatin structures corresponding to a few nucleosomes  
248 (Hsieh et al., 2015). This study also did not find evidence for chromatin fibers in yeast.  
249 However, the mapping of Micro-C data onto a 3-D chromatin model depends on some  
250 assumptions that have not yet been controlled for (Pombo and Dillon, 2015). Perhaps  
251 the most critical factor is how much the nucleus is perturbed by the fixation step. We  
252 have now shown that formaldehyde fixation used in 3C does not seriously perturb the  
253 nucleus. Therefore, cryo-ET and 3C yield the same conclusion that there is no evidence  
254 of chromatin fibers or large-scale nucleosome assemblies in yeast *in vivo*. As cryo-ET  
255 and 3C further improve, we will gain more complementary insights into chromatin

256 structure. Chromatin structural models of yeast can be further improved via the  
257 integration of super-resolution fluorescence *in situ* hybridization (Boettiger et al., 2016)  
258 and fluorescence microscopies (Ricci et al., 2015).

259

## 260 **The meaning of higher-order chromatin**

261 The prevailing model of higher-order chromatin is hierarchical. Nucleosomes are  
262 packed as highly ordered ~30-nm helical fibers (Fig. 6A). These fibers can then fold into  
263 ~130-nm-thick coiled structures called ‘chromonema fibers’, which fold into yet-larger  
264 structures such as mitotic chromosomes (Belmont and Bruce, 1994). None of these  
265 structures have been observed in the two small eukaryotes studied intact by cryo-ET: *S.*  
266 *cerevisiae* and the picoplankton *O. tauri*. While most of the nucleosome densities can  
267 be explained by polymer-melt-like chromatin (Fig. 6B), some densities pack into smaller  
268 oligomers containing fewer than ~5 nucleosomes. Some of these densities appear in a  
269 linear series, perhaps analogous to the face-to-face stacking motif seen in purified  
270 starfish sperm chromatin (Scheffer et al., 2012). We therefore propose that at least in  
271 smaller eukaryotes, chromatin is regulated by “lower-order” structures.

272 *S. cerevisiae* has an ultra-high gene density and an ultra-low abundance of  
273 introns (Derelle et al., 2006), meaning that on average, the coding region of each gene  
274 spans fewer than ~10 nucleosomes. Micro-C reveals that the most probable inter-  
275 chromatin interactions are along the diagonal of the contact map (Hsieh et al., 2015),  
276 i.e., between sequential nucleosomes. Nucleosome-occupancy data have shown that  
277 eukaryotic genes have a nucleosome-depleted region at the transcription start site (Lee  
278 et al., 2007). The combination of these high-throughput-sequencing-based models and

279 our direct-imaging data suggests that the coding regions of genes can fold into  
280 oligonucleosome clusters. In the absence of chromatin fibers, the overall nucleosomal  
281 arrangement is likely to be zigzag, punctuated by short stretches of extended linker  
282 DNA (Fig. 6C).

283

### 284 **Biological factors that disfavor higher-order chromatin**

285 Together with the previous reports, our study raises questions about the notion of  
286 higher-order structure, at least in proliferating cells. Indeed, the only two cell types  
287 shown to have chromatin fibers – by cryo-EM – are starfish sperm and chicken  
288 erythrocytes (Scheffer et al., 2011; Woodcock, 1994), both of which are terminally  
289 differentiated cells that have minimal transcriptional activity. What factors, then, inhibit  
290 fiber formation? Yeast chromatin is highly acetylated (Clarke et al., 1993), which would  
291 destabilize the critical ionic interaction between the histone H4 N-terminal tail and the  
292 acidic patch on adjacent nucleosomes (Shogren-Knaak et al., 2006). Hence, the extent  
293 of acetylation may be important for the modulating of chromosome compaction. Another  
294 factor that may influence chromatin fiber formation is that yeast has an unconventional  
295 linker histone compared to those found in chickens (Harshman et al., 2013). It will  
296 therefore be valuable to image the chromatin of cells that have low levels of acetylation  
297 and proliferating cells that have conventional linker histones.

298

### 299 **Biological consequence of nuclear architecture**

300 The absence of fibers and chromatin condensation in yeast leads to profound  
301 consequences because highly compact chromatin (Fig. 6A) exposes less sequence to

302 transcriptional machinery than loosely packed chromatin (Figs. 6B, C). Transcriptional  
303 repression would depend solely on either mononucleosomes or oligonucleosome  
304 clusters. DNA sequence accessibility would have to be increased by transient exposure  
305 of short sequences via nucleosome sliding or partial unwrapping. More sequence could  
306 be exposed by nucleosomal eviction, such as those found at steady-state in  
307 nucleosome-depleted regions. Our data, in combination with 3C suggests that yeast  
308 chromatin is best characterized as polymer-melt like, with small oligonucleosome  
309 clusters that do not pack into regular structures (Fig. 6C). The local compaction of  
310 coding regions could be a mechanism that suppresses aberrant transcriptional initiation  
311 (Struhl, 2007).

312 **Materials and methods**

313

314 **Yeast strains used in this study:**

| Strain | Genotype                                           | Source     |
|--------|----------------------------------------------------|------------|
| US1363 | <i>MATa bar1(unmarked) his3 leu2 trp1 ura3</i>     | Surana lab |
| US1375 | <i>MATa ura3 his3 cdc20D: LEU2 GAL-CDC20::TRP1</i> | Surana lab |

315

316 **Chicken erythrocyte chromatin preparation**

317 Fresh chicken blood was purchased from Nippon Bio-Test Laboratories Inc. (Japan).

318 Erythrocyte nuclei were prepared as before (Maeshima et al., 2014a). Chromatin

319 isolation was carried out as described by Ura and Kaneda with some modifications (Ura

320 and Kaneda, 2001). The nuclei (equivalent to ~2 mg of DNA) in Nuclei isolation buffer

321 (10 mM Tris-HCl pH 7.5, 1.5 mM MgCl<sub>2</sub>, 1.0 mM CaCl<sub>2</sub>, 0.25 M sucrose, 0.1 mM PMSF)

322 were digested with 50 units of micrococcal nuclease (Worthington) at 35°C for 2 min.

323 The reaction was stopped by addition of EGTA to 2 mM final concentration. After

324 washing with the Nuclei isolation buffer, the nuclei were lysed with Lysis buffer (10 mM

325 Tris-HCl pH 7.5, 5 mM EDTA, 0.1 mM PMSF). The lysate was dialyzed against Dialysis

326 buffer (10 mM Tris-HCl pH 7.5, 0.1 mM EDTA, 0.1 mM PMSF) at 4°C overnight. The

327 dialyzed lysate was centrifuged at 1000xG at 4°C for 5 minutes. The supernatant was

328 recovered and used as a purified chromatin fraction. The purity and integrity of the

329 chromatin protein components were verified by SDS-PAGE (Fig. S1A). To examine

330 average DNA length of the purified chromatin, DNA was isolated from the chromatin



331 fraction and electrophoresed in a 0.7% agarose gel (Fig. S1B).

332

### 333 ***S. cerevisiae* cell culture**

334 Cell culture (Lim et al., 1996), G1 arrest (Yeong et al., 2000), and metaphase arrest  
335 (Liang et al., 2012) were performed as previously reported. Wild-type strain US1363  
336 was grown in yeast-extract peptone medium (YEP) with 2 % glucose in a 24 °C water  
337 bath overnight. When the optical density at 600 nm reached ~0.5,  $\alpha$ -factor was added to  
338 the medium to a final concentration of 0.8  $\mu$ g/ml. After 3 h, the majority of cells were  
339 synchronized at G1. *cdc20 $\Delta$  GAL-CDC20* strain US1375 was incubated in YEP  
340 supplemented with 2 % raffinose and 2 % galactose in a 24 °C water bath overnight and  
341 synchronized at G1 in the same way. Then the culture was filtered and washed  
342 extensively to remove  $\alpha$ -factor and subsequently incubated in fresh YEP-glucose  
343 medium to inhibit CDC20 transcription. After 3.5 h, the majority of cells were arrested  
344 with long spindles, confirming that the *cdc20* was indeed depleted and cells were  
345 synchronized at metaphase (Yeong et al., 2000).

346

### 347 **Fluorescence microscopy**

348 Microtubules were stained as before (Lim et al., 1996). *S. cerevisiae* was collected by  
349 centrifuge at 13000 RPM (15871xG) for 1 min and fixed in 1 ml 0.1 M K<sub>2</sub>HPO<sub>4</sub> pH 6.4,  
350 3.7% formaldehyde at 4 °C overnight. Cells were then washed and resuspended in 0.2  
351 ml 1.2 M sorb/phos/cit (1.2 M sorbitol, 0.1 M phosphate-citrate, pH 5.9). Next, the cells  
352 were spheroplasted with 20  $\mu$ l glucylase (glucuronidase > 90,000 Units/mL and  
353 sulfatase > 10,000 Units/mL) and 2  $\mu$ l 10 mg/ml lyticase at 30 °C for 75 min. Then the

354 cells were washed and resuspended in 1.2 M sorb/phos/cit. 4  $\mu$ l of the sample was  
355 added to 30-well slide pre-treated with 0.1% poly-L-lysine (Sigma). Tubulin was stained  
356 with the rat monoclonal anti- $\alpha$ -tubulin YOL1/34 primary antibody (AbD Serotec  
357 MCA78G) and Alexa Fluor 594 conjugated goat anti-rat IgG secondary antibody  
358 (Invitrogen Molecular Probes A11007). DNA was counterstained with Vectashield-DAPI  
359 (Vector Laboratories, Inc.). The cells were imaged using a Zeiss AxioImager upright  
360 motorized microscope with Plan Aplanachromat 100X objective equipped with EXFO 120W  
361 metal-halide illuminator. Images were recorded on a Photometrics CoolSNAP HQ2 CCD  
362 camera controlled by Metamorph v7.7.10.0 software (Universal Imaging Corporation).

363

#### 364 **High-pressure freezing**

365 Yeast pellet or purified chicken-erythrocyte chromatin sample was mixed with 40-kDa  
366 dextran (Sigma) to a final concentration of 20% as an extracellular cryoprotectant. The  
367 sample/dextran mixture was loaded into a copper tube (0.45 mm outer diameter and 0.3  
368 mm inner diameter) by using a syringe-type filler device (Part 733-1, Engineering Office  
369 M. Wohlwend GmbH). The tube was sealed at one end and high-pressure frozen using  
370 an HPF Compact 01 machine (Engineering Office M. Wohlwend GmbH). Once frozen,  
371 the tube was stored in liquid nitrogen.

372

#### 373 **Preparation of fixed yeast for vitreous sections**

374 Wild-type yeast (US1363, 50ml) were grown to  $OD_{600}=0.36$  in a shaker at 200 RPM at  
375 24°C. The cells were then fixed by addition of 4.41 ml 37% formaldehyde (final  
376 concentration 3%) and incubated with shaking at 200 RPM for 15min at 30°C. Cells

377 were pelleted by centrifugation at 4600 RPM (1987xG) for 2 min at 4°C. The  
378 supernatant was removed and the cells were resuspended in 1 ml of YEPD. The cells  
379 were washed a second time by pelleting in at 4600 RPM (1987xG) for 2min.  
380 Supernatant was removed and dextran (in YEPD medium) was added to a final  
381 concentration of 20% as extracellular cryoprotectant. The cells were then quick-spun to  
382 3,000 RPM (845xG) to remove bubbles and then immediately high-pressure frozen as  
383 above.

384

### 385 **Vitreous sectioning**

386 Vitreous sections were cut using the strategy proposed by Ladinsky (Ladinsky, 2010).  
387 Frozen-hydrated samples were cut using a Leica UC7/FC7 cryo-ultramicrotome (Leica  
388 Microsystems, Vienna, Austria) at -150 °C. First a 100 X 100 X 30 µm mesa-shaped  
389 block was trimmed using a Trimtool 20 diamond blade (Diatome). Sections were then  
390 cut using a Cryo 25° diamond knife (Diatome). The nominal thickness was set to 50-100  
391 nm and cutting speed 1 mm/s. A customized micromanipulator (Narishige, MN-151S  
392 Model EDMS12-260) was used to control the cryo-ribbon. A “Crion” electrostatic  
393 charging device was operated in “discharge” mode to prevent the sections from sticking  
394 to the diamond blade (Pierson et al., 2010). Once the ribbon was 2-3 mm long, it was  
395 transferred onto an EM grid (Protochips C-flat or EMS continuous carbon grid Cat# CF-  
396 200-CU-50) to which 10-nm gold fiducials (BBI Cat# EM.GC10) were already added.  
397 This transfer was initiated by operating the Crion in “charge” mode. Subsequently, the  
398 ribbon was physically pressed with a 10-mm laser window glass (Edmund Optics stock  
399 # 65-855) to ensure firm attachment. The grid was stored in liquid nitrogen until imaging.

400

### 401 **Plunge freezing**

402 Plunge freezing was done using Vitrobot MARK IV (FEI, Eindhoven) operated at 20 °C  
403 with 100% humidity. Purified chromatin sample was mixed with 10-nm gold fiducials  
404 (BBI, as above) and 3 µl of this mixture was applied onto freshly glow-discharged EM  
405 grids with hole diameters and spacings appropriate for the sample type (see Table S2).  
406 The grid was blotted once and then plunged into a liquid propane-ethane mixture (Tivol  
407 et al., 2008).

408

### 409 **Electron cryotomography**

410 Tilt series were collected using Legikon (Suloway et al., 2009) or FEI TOMO 3 & 4 on a  
411 Titan Krios cryo-TEM (FEI, Eindhoven) operating at 300 KeV. Tomography data was  
412 recorded on either Falcon I or Falcon II direct-detection cameras. Imaging parameters  
413 for each sample type are listed in Table S2. Image alignment, CTF correction, 3-D  
414 reconstruction and visualization were done using IMOD software package (Kremer et  
415 al., 1996; Mastronarde, 1997; Xiong et al., 2009). Default settings were used except that  
416 the low pass filter cutoff was set to 0.3.

417

### 418 **Fourier analysis**

419 Tomographic slices were imported into ImageJ 1.49v (Schneider et al., 2012). The  
420 Fourier transform was calculated using the FFT function. The radial plot of the FT was  
421 generated using Radial Profile Angle plugin ([http://rsbweb.nih.gov/ij/plugins/radial-](http://rsbweb.nih.gov/ij/plugins/radial-profile-ext.html)  
422 [profile-ext.html](http://rsbweb.nih.gov/ij/plugins/radial-profile-ext.html)). The plot values (radius and normalized intensities) were saved. Radius

423 values in pixels were converted to values in real space based on the pixel size at the  
424 specimen level. The plot was generated using Excel (Microsoft Office, version 14.1.0)  
425 and saved as an image.

426

### 427 **Three-dimensional density visualization**

428 Isosurface rendering was done with the UCSF Chimera package (Pettersen et al.,  
429 2004). Subtomograms were normalized to a mean of 0 and standard deviation of 1  
430 using EMAN2 (Tang et al., 2007), and the contour level was set to  $1.5\sigma$ . Isosurface  
431 densities smaller than 6 nm were removed using the “hide dust” function.

432

### 433 **Template matching**

434 Template matching was done using PEET, which accounts for the tomographic missing  
435 wedge (Heumann, 2016; Nicastro et al., 2006). Oligonucleosome reference models  
436 were generated using Bsoft (Heymann and Belnap, 2007). To minimize the effects of  
437 adjacent densities in the highly crowded intranuclear environment, we applied either a  
438 squat or elongated cylindrical mask (depending on the aspect ratio of the reference)  
439 around the oligonucleosome reference. Overlapping hits were automatically subjected  
440 to duplicate removal at the end of template matching. The top 10% of hits were visually  
441 inspected to remove the remaining spurious hits.

442

### 443 **Figures & media**

444 All figures were composited in Adobe Photoshop or Adobe Illustrator; movie S1 was  
445 assembled and rendered with Adobe Premiere Pro (Adobe Systems, Inc., San Jose).

## 446 **Data sharing**

447 An example tomogram (corresponding to Fig. 2B) has been deposited at the EMDB  
448 (EMD-8157). Tilt series (raw) data and IMOD reconstruction parameters of all samples  
449 presented in this paper have been made publicly accessible in the EMPIAR online  
450 database: (EMPIAR-10076) (Iudin et al., 2016). Details of the corresponding figure and  
451 sample are summarized in Table S1.

452

## 453 **Acknowledgements**

454 We thank the CBIS cryo-EM staff for support and especially Mdm. Loy for microtomy  
455 training; Mark Ladinsky for cryomicrotomy advice; and Benoît Zuber, Danny Studer, and  
456 Dmitri Vanhecke for cryomicrotomy training at the Institute of Anatomy of the University  
457 of Bern. We thank John Heumann and David Mastronarde for advice on PEET and  
458 IMOD, and Matthijn Vos for Titan Krios training. We thank our CBIS colleagues and the  
459 Gan group for feedback on the manuscript. CC and LG were supported by NUS  
460 startups R-154-000-515-133, R-154-000-524-651, and D-E12-303-154-217, with  
461 equipment support from NUS YIA R-154-000-558-133 and MOE T2 R-154-000-624-  
462 112. HHL and US were funded by the Biomedical Research Council of A\*STAR  
463 (Agency of Science Technology and Research), Singapore. ST and KM were supported  
464 by JST CREST grant and MEXT KAKENHI grant (23115005).

465

## 466 **Abbreviations list**

467 Yeast, *S. cerevisiae*; Cryo-EM, Electron cryomicroscopy; Cryo-ET, Electron  
468 cryotomography; 3C, chromatin conformation capture.

## 469 **References**

- 470 Al-Amoudi, A., L.P. Norlen, and J. Dubochet. 2004. Cryo-electron microscopy of  
471 vitreous sections of native biological cells and tissues. *Journal of structural*  
472 *biology*. 148:131-135.
- 473 Belmont, A.S., and K. Bruce. 1994. Visualization of G1 chromosomes: a folded, twisted,  
474 supercoiled chromonema model of interphase chromatid structure. *The Journal*  
475 *of cell biology*. 127:287-302.
- 476 Boettiger, A.N., B. Bintu, J.R. Moffitt, S. Wang, B.J. Beliveau, G. Fudenberg, M.  
477 Imakaev, L.A. Mirny, C.T. Wu, and X. Zhuang. 2016. Super-resolution imaging  
478 reveals distinct chromatin folding for different epigenetic states. *Nature*. 529:418-  
479 422.
- 480 Brandt, F., L.-A. Carlson, F.U. Hartl, W. Baumeister, and K. Grunewald. 2010. The  
481 three-dimensional organization of polyribosomes in intact human cells. *MOLCELL*.  
482 39:560-569.
- 483 Brandt, F., S.A. Etchells, J.O. Ortiz, A.H. Elcock, F.U. Hartl, and W. Baumeister. 2009.  
484 The native 3D organization of bacterial polysomes. *Cell*. 136:261-271.
- 485 Brogaard, K., L. Xi, J.-P. Wang, and J. Widom. 2012. A map of nucleosome positions in  
486 yeast at base-pair resolution. *Nature*. 486:496-501.
- 487 Bystricky, K., P. Heun, L. Gehlen, J. Langowski, and S.M. Gasser. 2004. Long-range  
488 compaction and flexibility of interphase chromatin in budding yeast analyzed by  
489 high-resolution imaging techniques. *Proceedings of the National Academy of*  
490 *Sciences*. 101:16495-16500.
- 491 Cheng, T.M., S. Heeger, R.A. Chaleil, N. Matthews, A. Stewart, J. Wright, C. Lim, P.A.  
492 Bates, and F. Uhlmann. 2015. A simple biophysical model emulates budding  
493 yeast chromosome condensation. *eLife*. 4:e05565.
- 494 Clarke, D.J., L.P. O'Neill, and B.M. Turner. 1993. Selective use of H4 acetylation sites in  
495 the yeast *Saccharomyces cerevisiae*. *The Biochemical journal*. 294 ( Pt 2):557-  
496 561.
- 497 Davies, K.M., M. Strauss, B. Daum, J.H. Kief, H.D. Osiewacz, A. Rycovska, V.  
498 Zickermann, and W. Kühlbrandt. 2011. Macromolecular organization of ATP  
499 synthase and complex I in whole mitochondria. *Proceedings of the National*  
500 *Academy of Sciences*. 108:14121-14126.

- 501 Dekker, J. 2008. Mapping in vivo chromatin interactions in yeast suggests an extended  
502 chromatin fiber with regional variation in compaction. *The Journal of biological*  
503 *chemistry*. 283:34532-34540.
- 504 Dekker, J., M.A. Marti-Renom, and L.A. Mirny. 2013. Exploring the three-dimensional  
505 organization of genomes: interpreting chromatin interaction data. *Nature reviews.*  
506 *Genetics*. 14:390-403.
- 507 Derelle, E., C. Ferraz, S. Rombauts, P. Rouzé, A.Z. Worden, S. Robbens, F. Partensky,  
508 S. Degroeve, S. Echeynié, and R. Cooke. 2006. Genome analysis of the smallest  
509 free-living eukaryote *Ostreococcus tauri* unveils many unique features.  
510 *Proceedings of the National Academy of Sciences*. 103:11647-11652.
- 511 Dubochet, J., M. Adrian, J.J. Chang, J.C. Homo, J. Lepault, A.W. McDowell, and P.  
512 Schultz. 1988. Cryo-electron microscopy of vitrified specimens. *Quarterly reviews*  
513 *of biophysics*. 21:129-228.
- 514 Dubrovsky, A., S. Sorrentino, J. Harapin, K.T. Sapra, and O. Medalia. 2015.  
515 Developments in cryo-electron tomography for in situ structural analysis.  
516 *Archives of biochemistry and biophysics*. 581:78-85.
- 517 Eltsov, M., K.M. MacLellan, K. Maeshima, A.S. Frangakis, and J. Dubochet. 2008.  
518 Analysis of cryo-electron microscopy images does not support the existence of  
519 30-nm chromatin fibers in mitotic chromosomes in situ. *Proceedings of the*  
520 *National Academy of Sciences*. 105:19732-19737.
- 521 Finch, J.T., and A. Klug. 1976. Solenoidal model for superstructure in chromatin.  
522 *Proceedings of the National Academy of Sciences*. 73:1897-1901.
- 523 Finch, J.T., M. Noll, and R.D. Kornberg. 1975. Electron microscopy of defined lengths of  
524 chromatin. *Proceedings of the National Academy of Sciences of the United*  
525 *States of America*. 72:3320-3322.
- 526 Fussner, E., M. Strauss, U. Djuric, R. Li, K. Ahmed, M. Hart, J. Ellis, and D.P. Bazett-  
527 Jones. 2012. Open and closed domains in the mouse genome are configured as  
528 10-nm chromatin fibres. *EMBO reports*. 13:992-996.
- 529 Gan, L., and G.J. Jensen. 2012. Electron tomography of cells. *Quart. Rev. Biophys.*  
530 45:27-56.
- 531 Gan, L., M.S. Ladinsky, and G.J. Jensen. 2013. Chromatin in a marine picoeukaryote is  
532 a disordered assemblage of nucleosomes. *Chromosoma*. 122:377-386.



- 533 Guacci, V., E. Hogan, and D. Koshland. 1994. Chromosome condensation and sister  
534 chromatid pairing in budding yeast. *The Journal of cell biology*. 125:517-530.
- 535 Harshman, S.W., N.L. Young, M.R. Parthun, and M.A. Freitas. 2013. H1 histones:  
536 current perspectives and challenges. *Nucleic acids research*. 41:9593-9609.
- 537 Heumann, J.M. 2016. PEET.
- 538 Heymann, J.B., and D.M. Belnap. 2007. Bsoft: image processing and molecular  
539 modeling for electron microscopy. *Journal of structural biology*. 157:3-18.
- 540 Hsieh, T.-H.S., A. Weiner, B. Lajoie, J. Dekker, N. Friedman, and O.J. Rando. 2015.  
541 Mapping nucleosome resolution chromosome folding in yeast by Micro-C. *Cell*.  
542 162:108-119.
- 543 Iudin, A., P.K. Korir, J. Salavert-Torres, G.J. Kleywegt, and A. Patwardhan. 2016.  
544 EMPIAR: a public archive for raw electron microscopy image data. *Nature*  
545 *methods*.
- 546 Joti, Y., T. Hikima, Y. Nishino, F. Kamada, S. Hihara, H. Takata, T. Ishikawa, and K.  
547 Maeshima. 2012. Chromosomes without a 30-nm chromatin fiber. *Nucleus*.  
548 3:404-410.
- 549 Kremer, J.R., D.N. Mastronarde, and J.R. McIntosh. 1996. Computer visualization of  
550 three-dimensional image data using IMOD. *Journal of structural biology*. 116:71-  
551 76.
- 552 Ladinsky, M.S. 2010. Chapter Eight-Micromanipulator-Assisted Vitreous Cryosectioning  
553 and Sample Preparation by High-Pressure Freezing. *Methods in enzymology*.  
554 481:165-194.
- 555 Lee, W., D. Tillo, N. Bray, R.H. Morse, R.W. Davis, T.R. Hughes, and C. Nislow. 2007.  
556 A high-resolution atlas of nucleosome occupancy in yeast. *Nature genetics*.  
557 39:1235-1244.
- 558 Liang, H., H.H. Lim, A. Venkitaraman, and U. Surana. 2012. Cdk1 promotes kinetochore  
559 bi - orientation and regulates Cdc20 expression during recovery from spindle  
560 checkpoint arrest. *The EMBO journal*. 31:403-416.
- 561 Lim, H.H., P.-Y. Goh, and U. Surana. 1996. Spindle pole body separation in  
562 *Saccharomyces cerevisiae* requires dephosphorylation of the tyrosine 19 residue  
563 of Cdc28. *Molecular and Cellular Biology*. 16:6385-6397.

- 564 Luger, K., A.W. Mäder, R.K. Richmond, D.F. Sargent, and T.J. Richmond. 1997. Crystal  
565 structure of the nucleosome core particle at 2.8 Å resolution. *Nature*. 389:251-  
566 260.
- 567 Maeshima, K., S. Hihara, and M. Eltsov. 2010. Chromatin structure: does the 30-nm  
568 fibre exist in vivo? *Current opinion in cell biology*. 22:291-297.
- 569 Maeshima, K., R. Imai, T. Hikima, and Y. Joti. 2014a. Chromatin structure revealed by  
570 X-ray scattering analysis and computational modeling. *Methods*. 70:154-161.
- 571 Maeshima, K., R. Imai, S. Tamura, and T. Nozaki. 2014b. Chromatin as dynamic 10-nm  
572 fibers. *Chromosoma*. 123:225-237.
- 573 Maeshima, K., R. Rogge, S. Tamura, Y. Joti, T. Hikima, H. Szerlong, C. Krause, J.  
574 Herman, E. Seidel, J. DeLuca, T. Ishikawa, and J.C. Hansen. 2016. Nucleosomal  
575 arrays self-assemble into supramolecular globular structures lacking 30-nm  
576 fibers. *The EMBO journal*. 35:1115-1132.
- 577 Mahamid, J., S. Pfeffer, M. Schaffer, E. Villa, R. Danev, L.K. Cuellar, F. Forster, A.A.  
578 Hyman, J.M. Plitzko, and W. Baumeister. 2016. Visualizing the molecular  
579 sociology at the HeLa cell nuclear periphery. *Science*. 351:969-972.
- 580 Mastronarde, D.N. 1997. Dual-axis tomography: an approach with alignment methods  
581 that preserve resolution. *Journal of structural biology*. 120:343-352.
- 582 McDowell, A.W., J.M. Smith, and J. Dubochet. 1986. Cryo-electron microscopy of  
583 vitrified chromosomes in situ. *The EMBO journal*. 5:1395-1402.
- 584 Nagano, T., Y. Lubling, T.J. Stevens, S. Schoenfelder, E. Yaffe, W. Dean, E.D. Laue, A.  
585 Tanay, and P. Fraser. 2013. Single-cell Hi-C reveals cell-to-cell variability in  
586 chromosome structure. *Nature*. 502:59-64.
- 587 Nicastro, D., C. Schwartz, J. Pierson, R. Gaudette, M.E. Porter, and J.R. McIntosh.  
588 2006. The molecular architecture of axonemes revealed by cryoelectron  
589 tomography. *Science*. 313:944-948.
- 590 Nishino, Y., M. Eltsov, Y. Joti, K. Ito, H. Takata, Y. Takahashi, S. Hihara, A.S.  
591 Frangakis, N. Imamoto, T. Ishikawa, and K. Maeshima. 2012. Human mitotic  
592 chromosomes consist predominantly of irregularly folded nucleosome fibres  
593 without a 30 - nm chromatin structure. *The EMBO journal*. 31:1644-1653.

- 594 O'Toole, E.T., M. Winey, and J.R. McIntosh. 1999. High-voltage electron tomography of  
595 spindle pole bodies and early mitotic spindles in the yeast *Saccharomyces*  
596 *cerevisiae*. *Molecular biology of the cell*. 10:2017-2031.
- 597 Olins, A.L., and D.E. Olins. 1974. Spheroid chromatin units (v bodies). *Science*.  
598 183:330-332.
- 599 Pettersen, E.F., T.D. Goddard, C.C. Huang, G.S. Couch, D.M. Greenblatt, E.C. Meng,  
600 and T.E. Ferrin. 2004. UCSF Chimera--a visualization system for exploratory  
601 research and analysis. *Journal of computational chemistry*. 25:1605-1612.
- 602 Pierson, J., J.J. Fernández, E. Bos, S. Amini, H. Gnaegi, M. Vos, B. Bel, F. Adolfsen,  
603 J.L. Carrascosa, and P.J. Peters. 2010. Improving the technique of vitreous cryo-  
604 sectioning for cryo-electron tomography: electrostatic charging for section  
605 attachment and implementation of an anti-contamination glove box. *Journal of*  
606 *structural biology*. 169:219-225.
- 607 Pilhofer, M., and G.J. Jensen. 2013. The bacterial cytoskeleton: more than twisted  
608 filaments. *Current opinion in cell biology*. 25:125-133.
- 609 Pombo, A., and N. Dillon. 2015. Three-dimensional genome architecture: players and  
610 mechanisms. *Nature reviews. Molecular cell biology*. 16:245-257.
- 611 Ricci, M.A., C. Manzo, M.F. García-Parajo, M. Lakadamyali, and M.P. Cosma. 2015.  
612 Chromatin Fibers Are Formed by Heterogeneous Groups of Nucleosomes In  
613 Vivo. *Cell*. 160:1145-1158.
- 614 Robinow, C.F., and J. Marak. 1966. A fiber apparatus in the nucleus of the yeast cell.  
615 *The Journal of cell biology*. 29:129-151.
- 616 Robinson, P.J., L. Fairall, V.A. Huynh, and D. Rhodes. 2006. EM measurements define  
617 the dimensions of the "30-nm" chromatin fiber: evidence for a compact,  
618 interdigitated structure. *Proceedings of the National Academy of Sciences*.  
619 103:6506-6511.
- 620 Schalch, T., S. Duda, D.F. Sargent, and T.J. Richmond. 2005. X-ray structure of a  
621 tetranucleosome and its implications for the chromatin fibre. *Nature*. 436:138-  
622 141.
- 623 Scheffer, M.P., M. Eltsov, J. Bednar, and A.S. Frangakis. 2012. Nucleosomes stacked  
624 with aligned dyad axes are found in native compact chromatin in vitro. *Journal of*  
625 *structural biology*. 178:207-214.

- 626 Scheffer, M.P., M. Eltsov, and A.S. Frangakis. 2011. Evidence for short-range helical  
627 order in the 30-nm chromatin fibers of erythrocyte nuclei. *Proceedings of the*  
628 *National Academy of Sciences*. 108:16992-16997.
- 629 Schneider, C.A., W.S. Rasband, and K.W. Eliceiri. 2012. NIH Image to ImageJ: 25  
630 years of image analysis. *Nature methods*. 9:671-675.
- 631 Shogren-Knaak, M., H. Ishii, J.M. Sun, M.J. Pazin, J.R. Davie, and C.L. Peterson. 2006.  
632 Histone H4-K16 acetylation controls chromatin structure and protein interactions.  
633 *Science*. 311:844-847.
- 634 Smallwood, A., and B. Ren. 2013. Genome organization and long-range regulation of  
635 gene expression by enhancers. *Current opinion in cell biology*. 25:387-394.
- 636 Song, F., P. Chen, D. Sun, M. Wang, L. Dong, D. Liang, R.-M. Xu, P. Zhu, and G. Li.  
637 2014. Cryo-EM study of the chromatin fiber reveals a double helix twisted by  
638 tetranucleosomal units. *Science*. 344:376-380.
- 639 Struhl, K. 2007. Transcriptional noise and the fidelity of initiation by RNA polymerase II.  
640 *Nature structural & molecular biology*. 14:103-105.
- 641 Suloway, C., J. Shi, A. Cheng, J. Pulokas, B. Carragher, C.S. Potter, S.Q. Zheng, D.A.  
642 Agard, and G.J. Jensen. 2009. Fully automated, sequential tilt-series acquisition  
643 with Legimon. *Journal of structural biology*. 167:11-18.
- 644 Tang, G., L. Peng, P.R. Baldwin, D.S. Mann, W. Jiang, I. Rees, and S.J. Ludtke. 2007.  
645 EMAN2: an extensible image processing suite for electron microscopy. *Journal of*  
646 *structural biology*. 157:38-46.
- 647 Tivol, W.F., A. Briegel, and G.J. Jensen. 2008. An improved cryogen for plunge  
648 freezing. *MAM*. 14:375-379.
- 649 Tschochner, H., and E. Hurt. 2003. Pre-ribosomes on the road from the nucleolus to the  
650 cytoplasm. *Trends in cell biology*. 13:255-263.
- 651 Ura, K., and Y. Kaneda. 2001. Reconstitution of chromatin in vitro. *Methods in*  
652 *molecular biology*. 181:309-325.
- 653 Vas, A.C., C.A. Andrews, K. Kirkland Matesky, and D.J. Clarke. 2007. In vivo analysis of  
654 chromosome condensation in *Saccharomyces cerevisiae*. *Molecular biology of*  
655 *the cell*. 18:557-568.

- 656 Widom, J. 1989. Toward a unified model of chromatin folding. *Annual review of*  
657 *biophysics and biophysical chemistry*. 18:365-395.
- 658 Winey, M., C.L. Mamay, E.T. O'Toole, D.N. Mastronarde, T.H. Giddings, Jr., K.L.  
659 McDonald, and J.R. McIntosh. 1995. Three-dimensional ultrastructural analysis  
660 of the *Saccharomyces cerevisiae* mitotic spindle. *The Journal of cell biology*.  
661 129:1601-1615.
- 662 Woodcock, C.L. 1994. Chromatin fibers observed in situ in frozen hydrated sections.  
663 Native fiber diameter is not correlated with nucleosome repeat length. *The*  
664 *Journal of cell biology*. 125:11-19.
- 665 Xiong, Q., M.K. Morpew, C.L. Schwartz, A.H. Hoenger, and D.N. Mastronarde. 2009.  
666 CTF determination and correction for low dose tomographic tilt series. *Journal of*  
667 *structural biology*. 168:378-387.
- 668 Yeong, F.M., H.H. Lim, C.G. Padmashree, and U. Surana. 2000. Exit from mitosis in  
669 budding yeast: biphasic inactivation of the Cdc28-Clb2 mitotic kinase and the role  
670 of Cdc20. *Molecular cell*. 5:501-511.  
671  
672

673 **List of figures and tables**

674 Fig. 1. Chromatin fibers are compact and remain intact in cryosections.

675 Fig. 2. Chromatin is not organized as fibers in yeast.

676 Fig. 3. Yeast nuclei are crowded, but do not have highly ordered chromatin complexes.

677 Fig. 4. Fixation does not seriously perturb nuclear structure.

678 Fig. 5. Oligonucleosome-like densities are heterogeneous.

679 Fig. 6. Yeast chromatin has a polymer-melt-like structure with local nucleosome  
680 clustering.

681 Table 1. Summary of chromatin conformations observed.

682

683 Fig. S1. Isolation of chicken erythrocyte chromatin

684 Fig. S2. Chromatin fibers are recognizable regardless of cryo-EM sample-preparation  
685 method

686 Fig. S3. Synchronization of *S. cerevisiae*

687 Fig. S4. Additional examples of G1, metaphase-arrested, and formaldehyde-fixed cells

688 Fig. S5. Chromatin fiber signals are absent regardless of imaging conditions

689 Table S1. Tomogram details

690 Table S2. Cryotomography imaging conditions

691 Movie S1. 3-D visualization of yeast chromatin



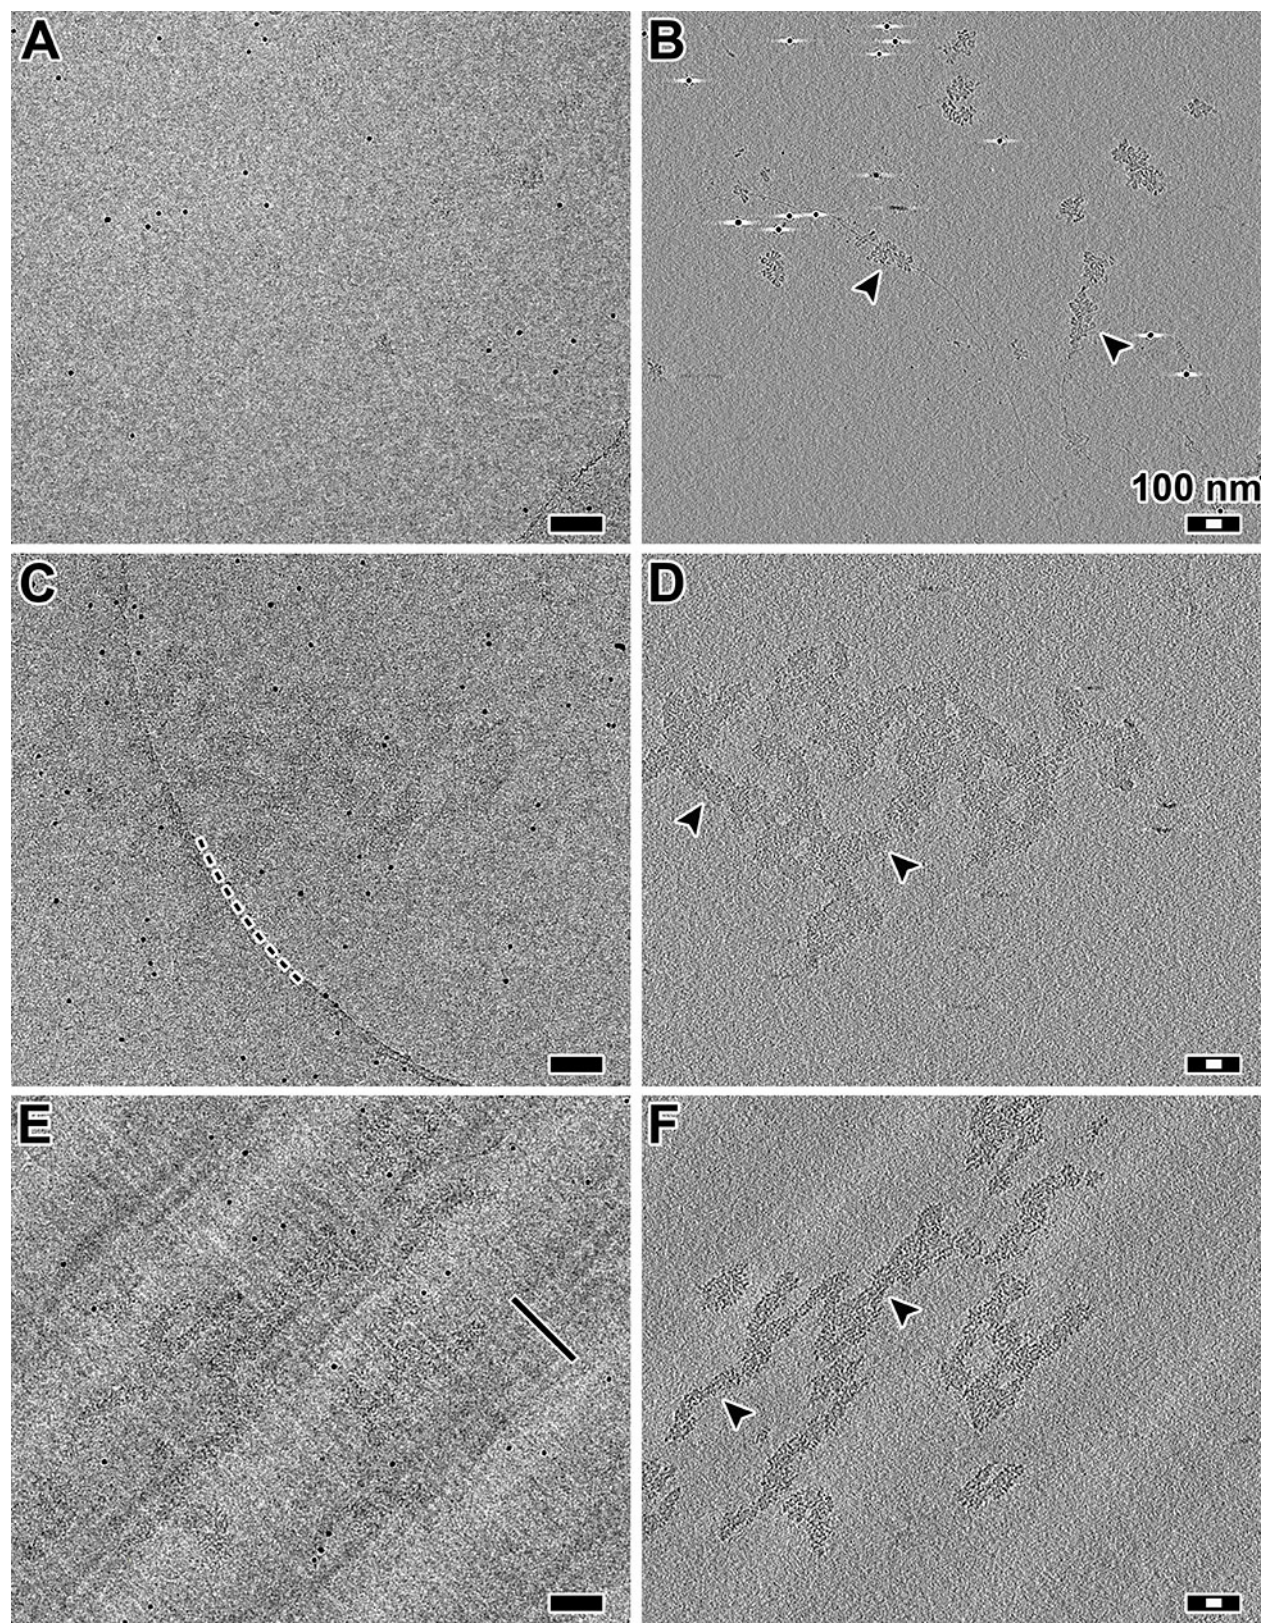

692

693

**Figure 1. Chromatin fibers are compact and remain intact in cryosections**



694 **(A)** Projection image of chicken erythrocyte chromatin fibers plunge-frozen in dialysis  
695 buffer. **(B)** Tomographic slice (12-nm thick) of the position in (A). Arrowheads indicate  
696 examples of chromatin fibers. **(C)** Projection image of chicken erythrocyte chromatin  
697 fibers plunge-frozen in the presence of dextran. Note that due to low dose ( $\sim 2 \text{ e}/\text{\AA}^2$  per  
698 projection) and relatively small defocus ( $\sim 6 \mu\text{m}$ ), the fibers are difficult to see. The dark,  
699 punctate densities are 10-nm gold fiducials. The dashed line marks the curved edge of  
700 the holey carbon support. **(D)** Tomographic slice (12-nm thick) of the position in (C).  
701 Arrowheads indicate examples of chromatin fibers. **(E)** Projection image of a frozen-  
702 hydrated section containing chromatin fibers. Knife marks are thin linear features that  
703 are parallel to the cutting direction, as indicated by the black arrow. **(F)** Tomographic  
704 slice (12-nm thick) of the same area as in (E). Arrowheads indicate examples of  
705 chromatin fibers. The alternating light-dark background bands running from the lower  
706 left to upper right of C and D are crevasse artifacts, which are visible due to the  
707 proximity of the tomographic slice to the cryosection surface. Black scale bars are 100  
708 nm; white scale bars are 30 nm.



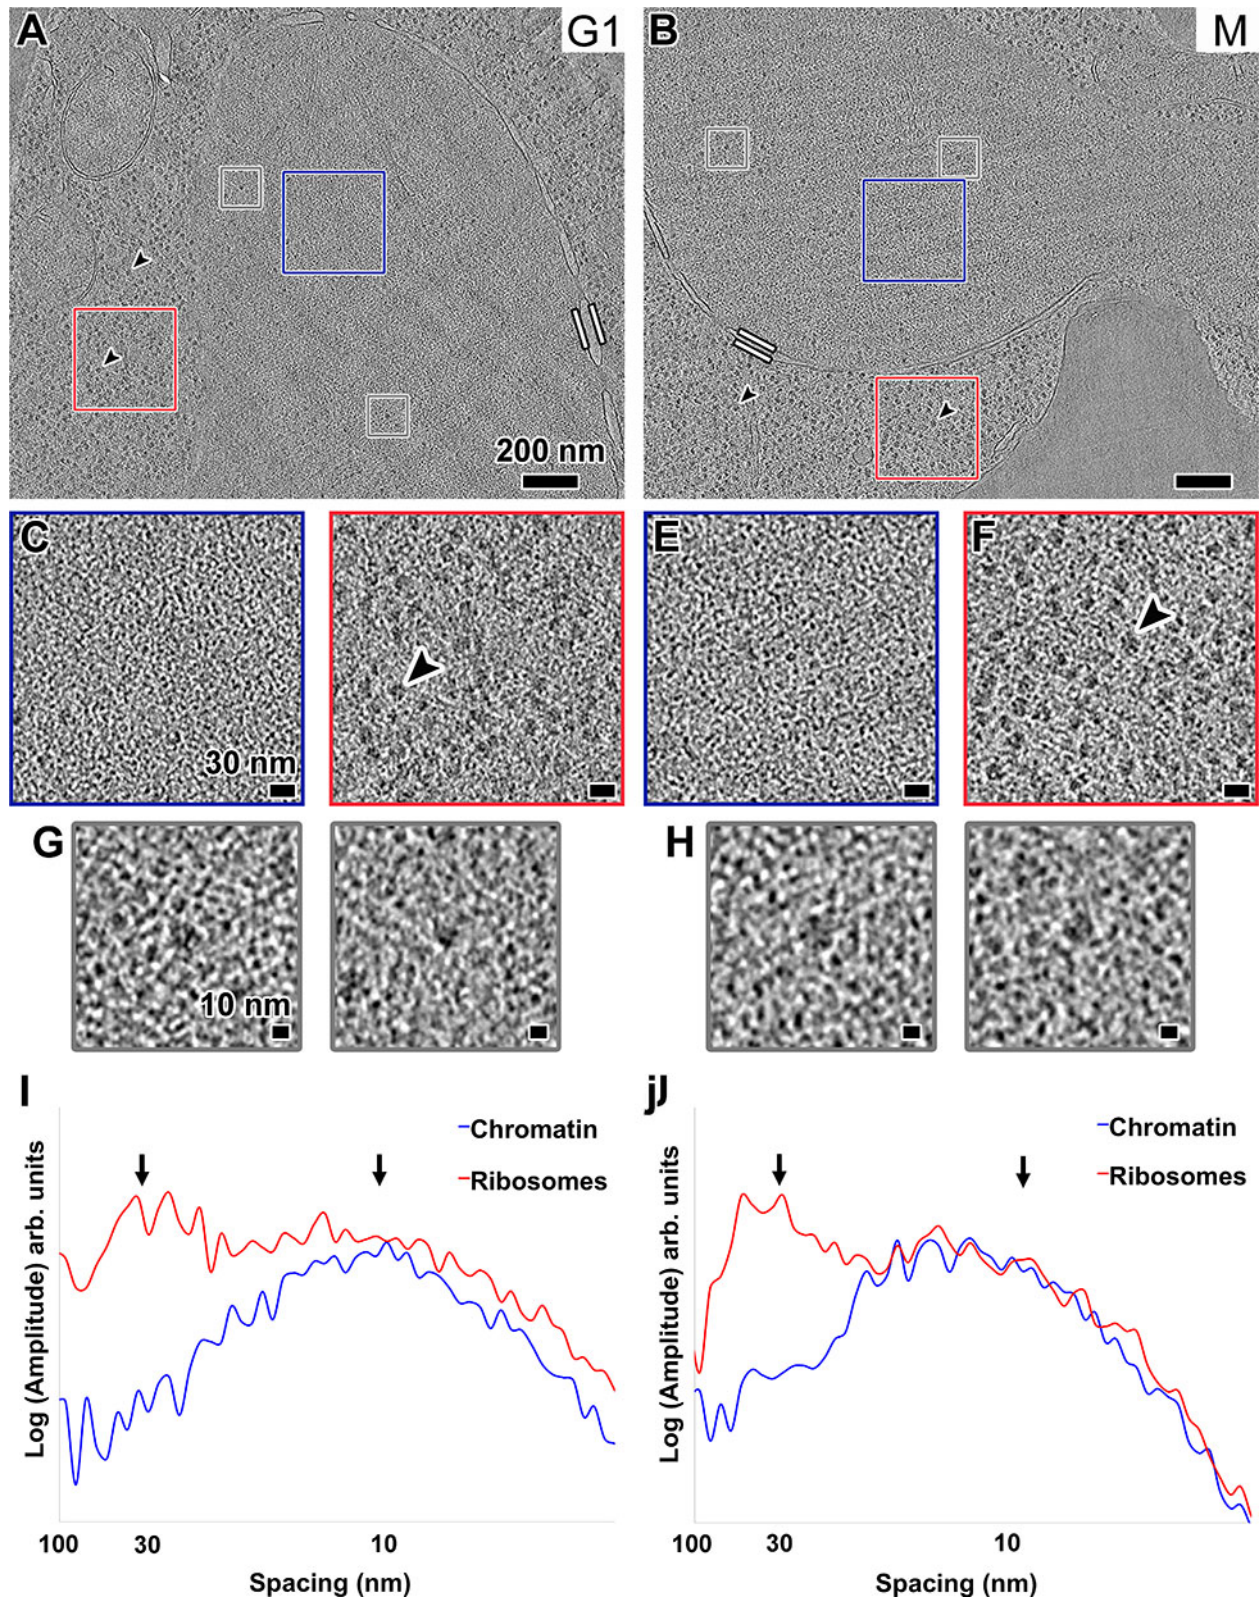

709

710

**Figure 2. Chromatin is not organized as fibers in yeast**

711 Tomographic slices (30-nm thick) of yeast nuclei in **(A)** G1 and **(B)** metaphase (M) cells.  
712 The nuclei (Nuc) and a mitochondria (Mi) are labeled. Parallel white bars mark inner-  
713 and outer-nuclear membranes. Black arrowheads point to cytoplasmic ribosomes. Scale  
714 bars are 200 nm. **(C)** and **(E)** Enlargements (3-fold) of the intranuclear positions  
715 enclosed by blue boxes in panels (A) and (B), respectively. **(D)** and **(F)** Enlargements  
716 (3-fold) of cytoplasmic ribosomes enclosed by red boxes in panels (A) and (B),  
717 respectively. Scale bars are 30 nm. **(G)** and **(H)** Examples of intranuclear ribosome-  
718 sized densities boxed out (grey) from (A) and (B), respectively, and enlarged 6-fold.  
719 Scale bars are 10 nm. **(I)** and **(J)** Rotationally averaged power spectra of chromatin-  
720 and ribosome-rich positions from (C) and (D), (E) and (F), respectively. Arrows point to  
721 30- and 10-nm spacings.



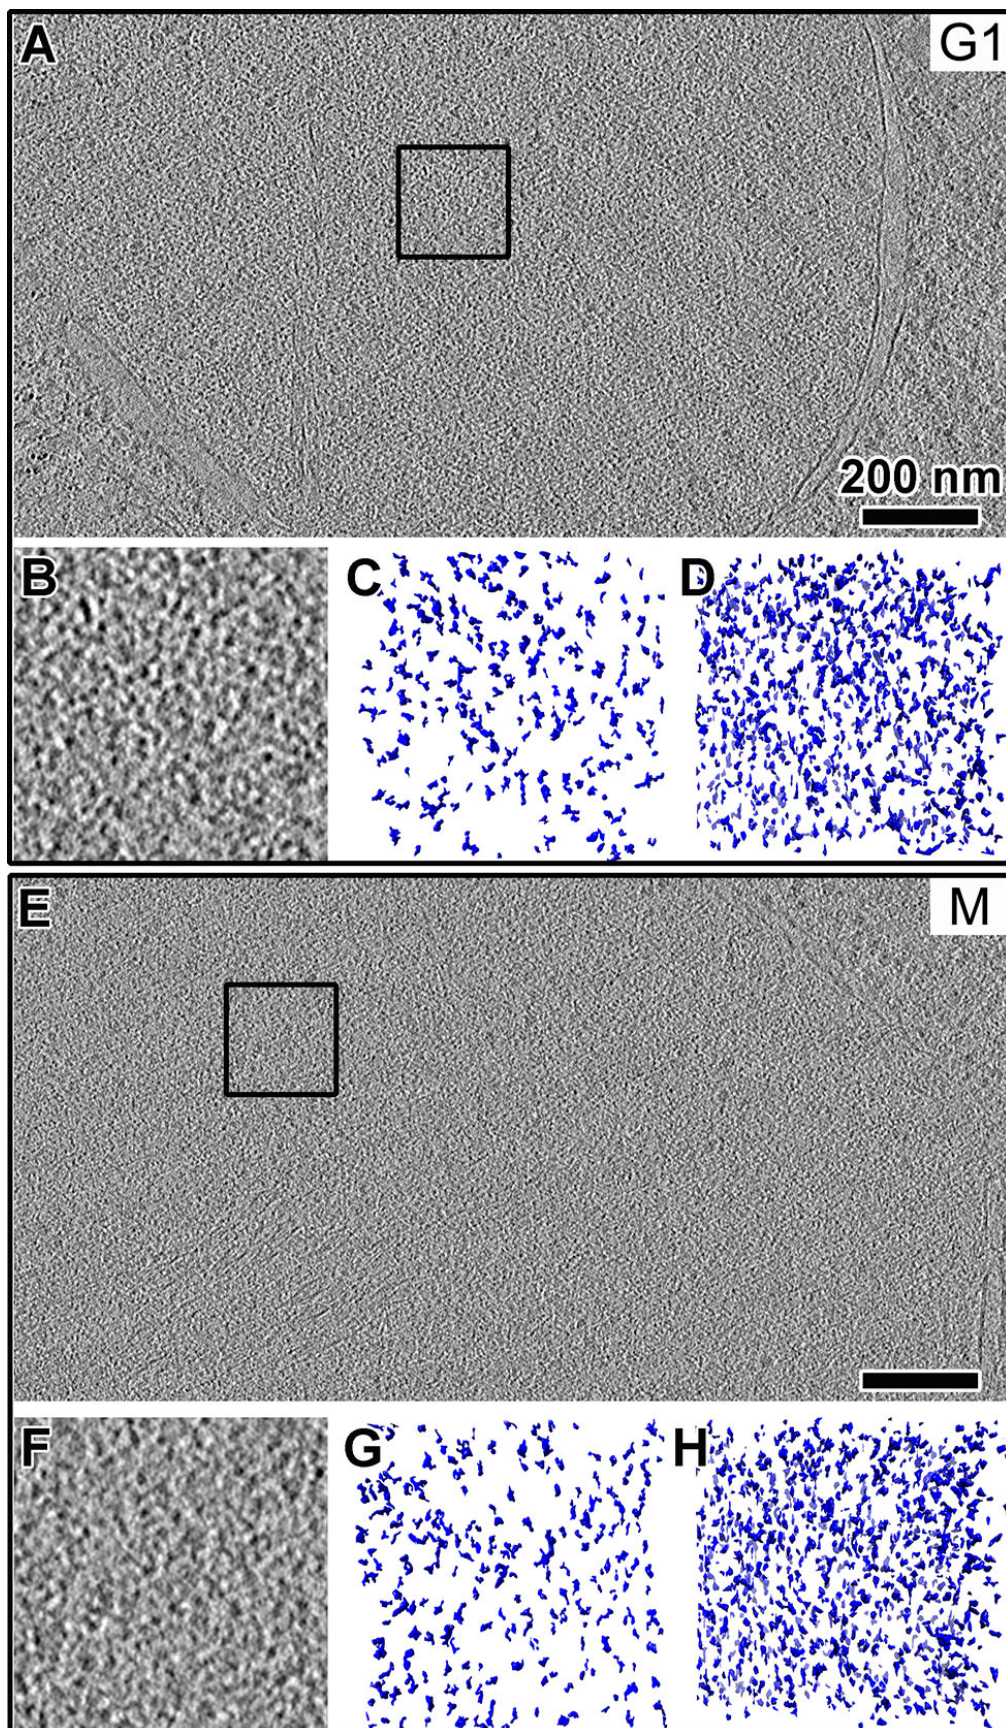

723 **Figure 3. Yeast nuclei are crowded, but do not have highly ordered chromatin**  
724 **complexes**

725 Tomographic slices (10-nm thick) of nuclei in a **(A)** G1 and **(E)** metaphase (M) cell.  
726 Scale bars are 200 nm. **(B)** and **(F)** Enlargements (3-fold) of the intranuclear positions  
727 enclosed by boxes in panels (A) and (E), respectively. **(C)** and **(G)** Isosurface rendering  
728 of a 10-nm-thick volume of the region in (B) and (F), respectively. Note that some of the  
729 smaller densities are from tomographic slices just “above” and “below” the selected  
730 volume. **(D)** and **(H)** Isosurface rendering of a 70-nm-thick volume centered on the  
731 same region in (B) and (F), respectively.



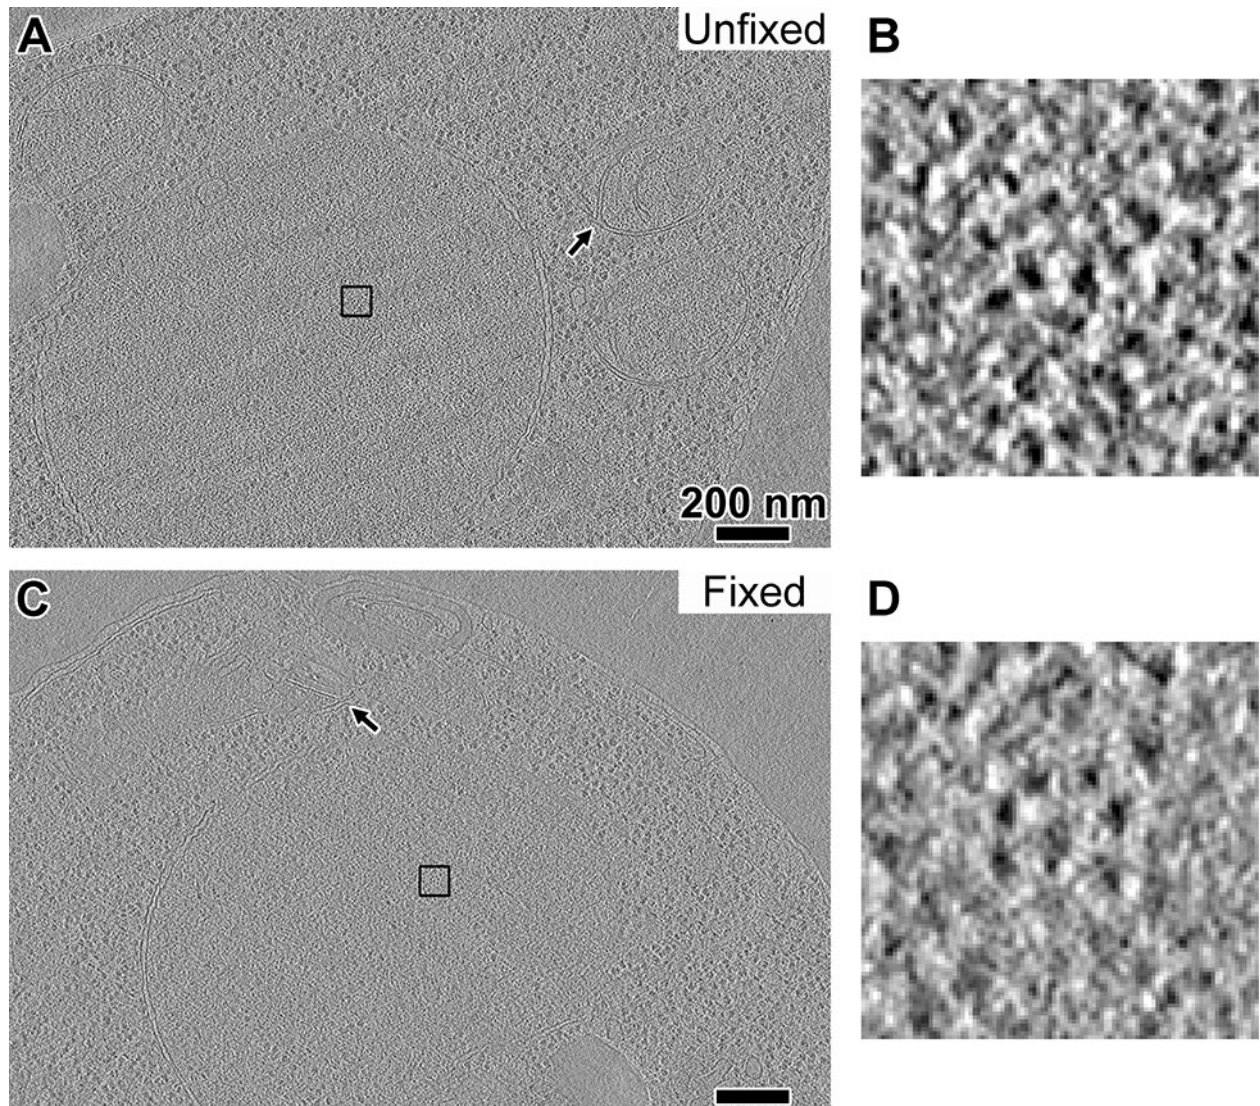

732

733 **Figure 4. Fixation does not seriously perturb nuclear structure**

734 **(A)** A tomographic slice (10-nm thick) of an unfixed US1363 G1-arrested cell; **(B)** A 15-  
735 fold enlargement of the nuclear densities boxed in (A). **(C)** A tomographic slice (10-nm  
736 thick) of a formaldehyde-fixed US1363 cell. **(D)** A 15-fold enlargement of the nuclear  
737 densities boxed in in (C). Arrows point to the mitochondrial membranes. Scale bars are  
738 200 nm.

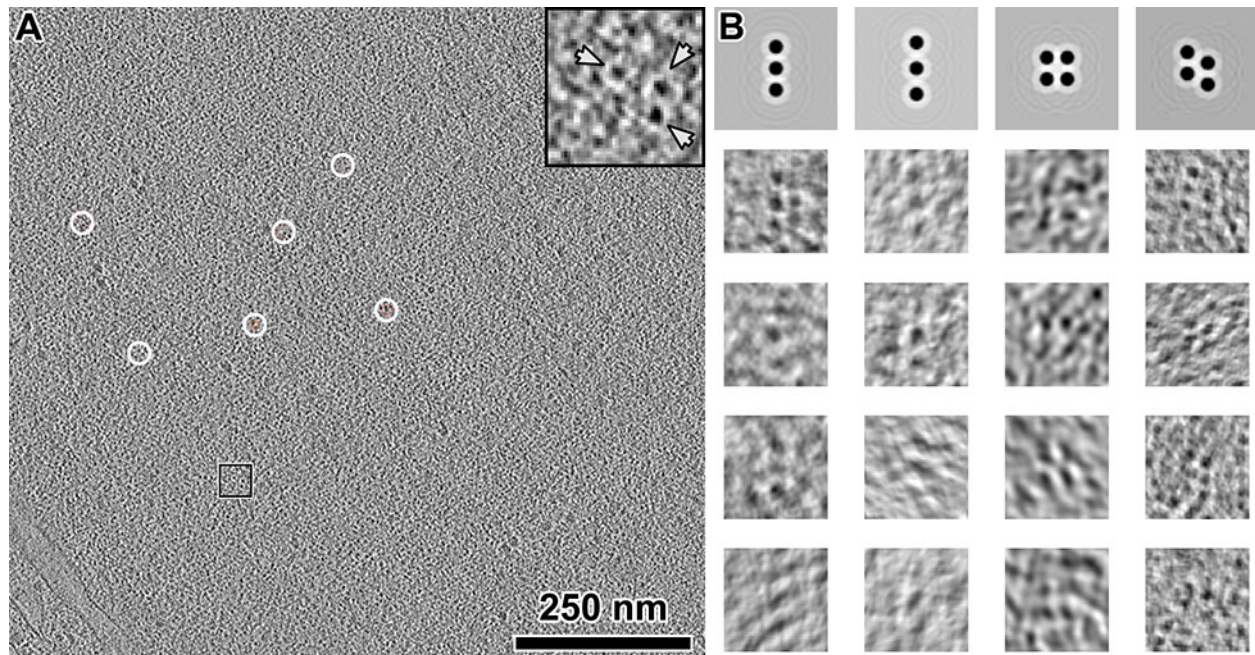

739

740 **Figure 5. Oligonucleosome-like densities are heterogeneous**

741 **(A)** A tomographic slice (10-nm thick) of the interior of a G1 nucleus. The few template-  
742 matching hits of a candidate tetranucleosomes are circled, but only part of the density is  
743 within this 10-nm-thick volume. **(B)** Upper row: Four different templates showing  
744 potential clustering of nucleosomes, enlarged 6-fold relative to (A). Lower rows:  
745 examples of extracted and aligned template-matching hits (10-nm thick tomographic  
746 slice), showing the heterogeneous nature of these particles. The missing wedge causes  
747 some of the densities to appear elongated along one direction.



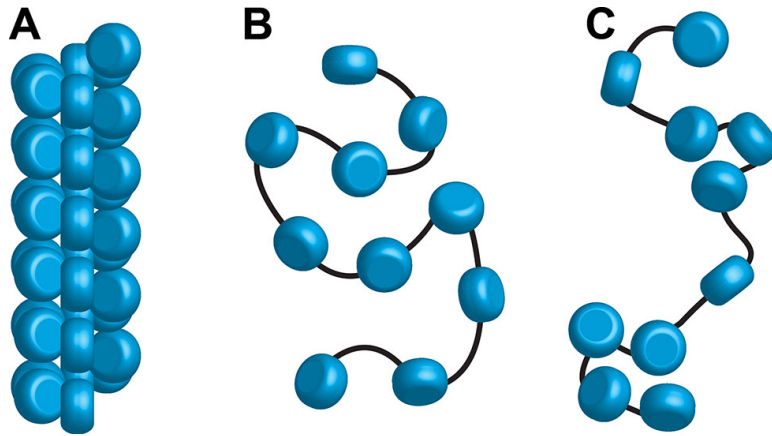

748

749 **Figure 6. Yeast chromatin has a polymer-melt-like structure with local**  
750 **nucleosome clustering**

751 Three levels of chromatin organization: **(A)** regular 30-nm fiber, **(B)** disordered polymer-  
752 melt-like chromatin, and **(C)** polymer-melt interspersed with local nucleosome clusters.

753 Our cryo-ET data is more consistent with nucleosomes (blue cylinders) packing without  
754 long-range order (B and C). Black lines indicate how linker DNA might connect adjacent  
755 nucleosomes.

756

757 **Table 1. Summary of chromatin conformations observed**

| Sample                         | Treatment                   | Observations              | Data                         | Notes                        |
|--------------------------------|-----------------------------|---------------------------|------------------------------|------------------------------|
| CEN + 2 mM<br>Mg <sup>2+</sup> | PF, no Dextran              | Disperse 30-nm<br>fiber   | Figs. 1, S2                  | + control                    |
| CEN + 2 mM<br>Mg <sup>2+</sup> | PF, Dextran                 | Aggregates of<br>fiber    | Figs. 1, S2                  | + control                    |
| CEN + 2 mM<br>Mg <sup>2+</sup> | CEMOVIS, Dextran            | Aggregates,<br>compressed | Figs. 1, S2                  | + control                    |
| Wild-type cells                | CEMOVIS, fixed,<br>Dextran* | Irregular<br>chromatin    | Figs. 4, S4C                 | + control,<br><i>in vivo</i> |
| G1 cells                       | CEMOVIS, Dextran*           | Irregular<br>chromatin    | Figs. 2, 3, 4, 5,<br>S4A, S5 | <i>in vivo</i>               |
| Metaphase cells                | CEMOVIS, Dextran*           | Irregular<br>chromatin    | Figs. 2, 3,<br>S4B, Movie S1 | <i>in vivo</i>               |

758 \* Note that the cell wall prevents dextran from entering, so chromatin inside cells is not  
 759 perturbed by dextran. CEN, chicken-erythrocyte nuclei chromatin

760



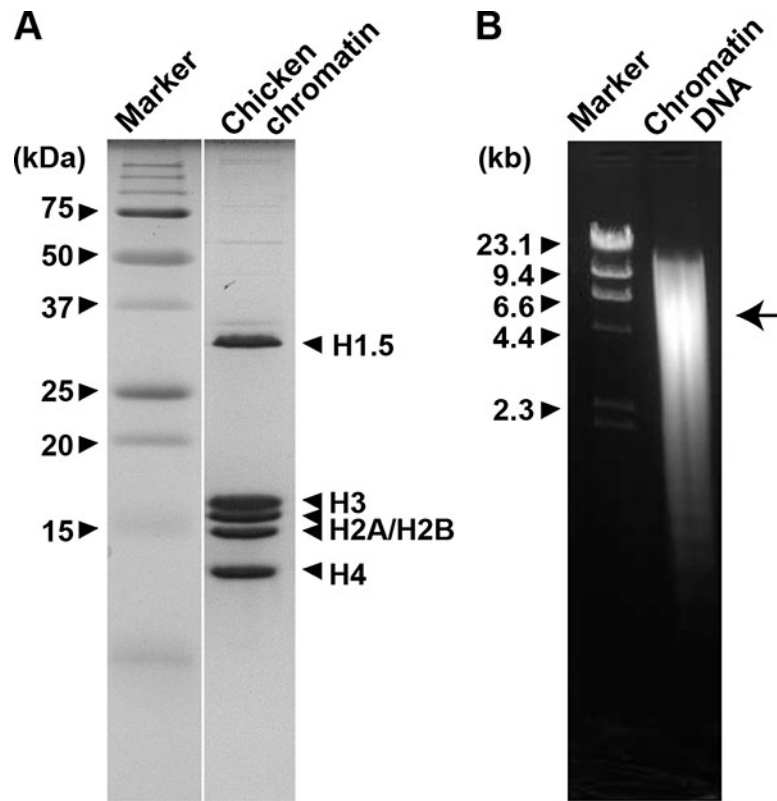

761

762 **Figure S1. Isolation of chicken erythrocyte chromatin**

763 **(A)** SDS-PAGE of purified chromatin. Nucleosome core histones H2A/H2B, H3 and H4

764 as well as linker histone H1.5 are present in the sample. **(B)** Agarose gel of isolated

765 chromatin DNA. Average DNA length is ~5 kb (arrow).

766

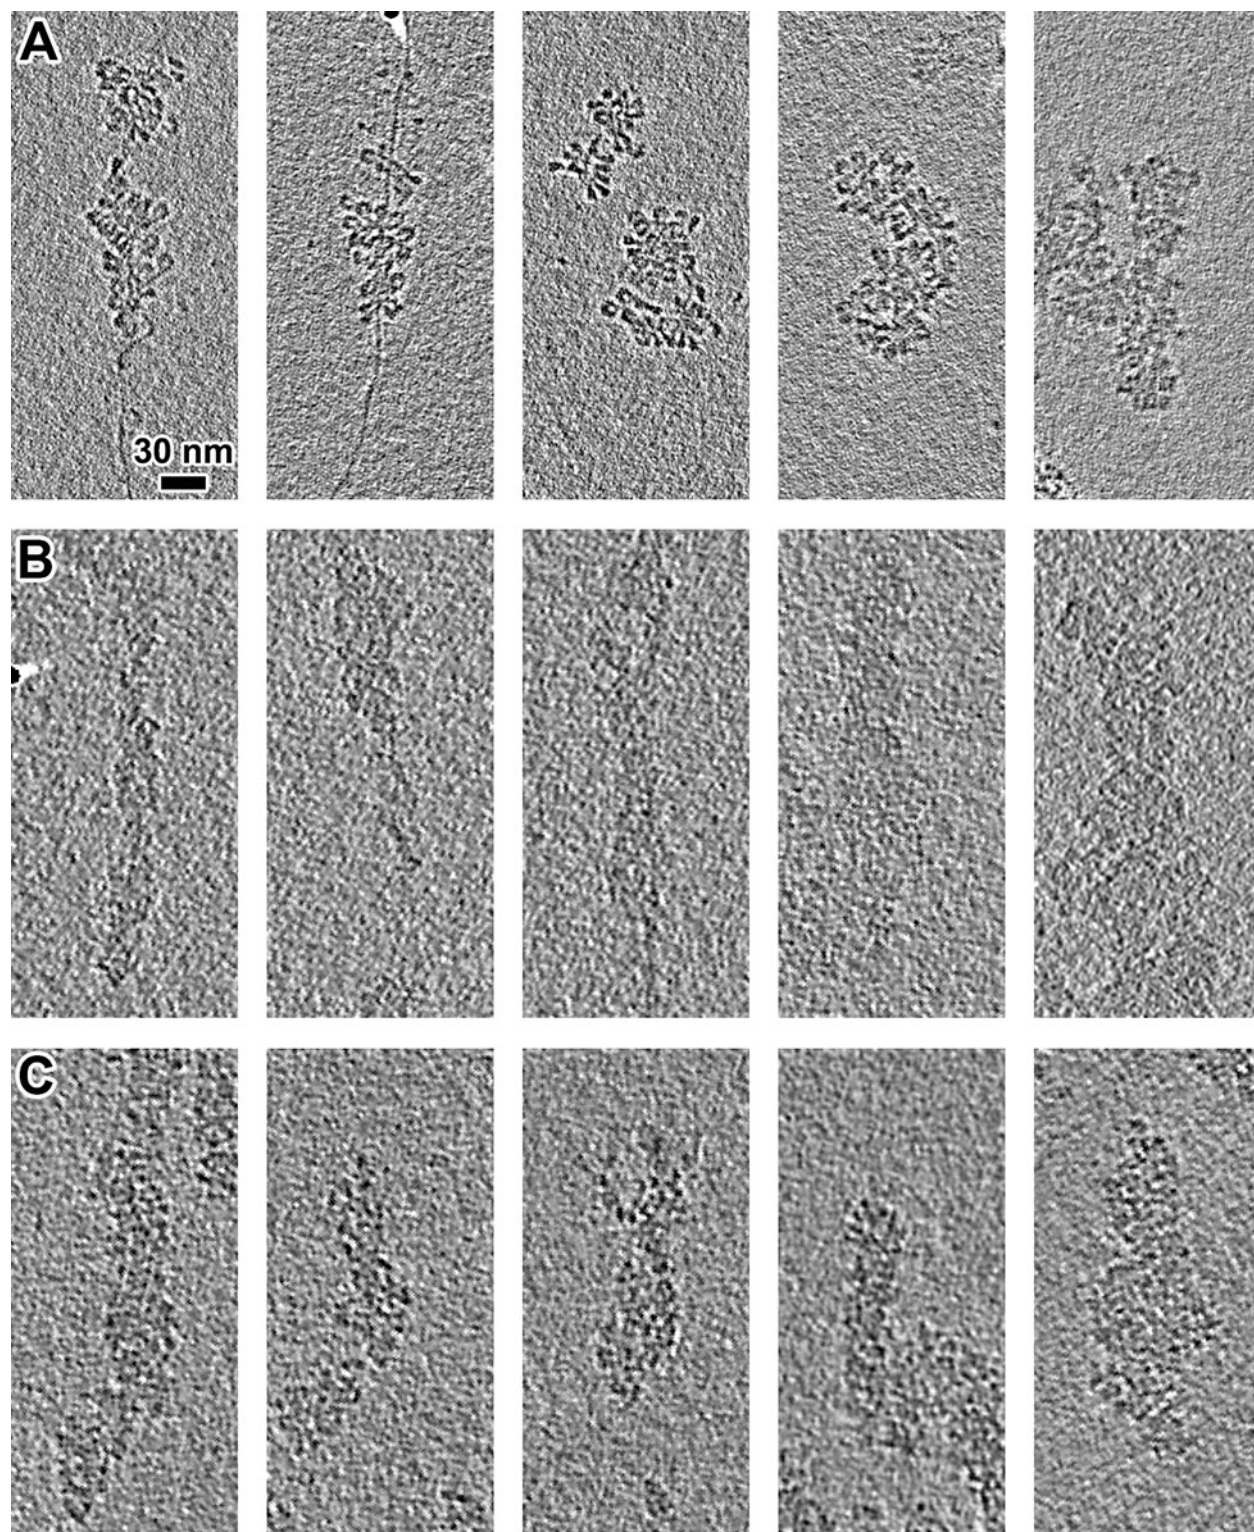

767

768 **Figure S2. Chromatin fibers are recognizable regardless of cryo-EM sample-**

769 **preparation method**

770 Row **(A)**: plunge-frozen in isolation buffer; row **(B)**: plunge-frozen in isolation buffer plus  
771 20% 40-kDa dextran; row **(C)**: high-pressure frozen in isolation buffer plus 20% dextran,  
772 then cryosectioned. Note that the addition of dextran substantially lowers the image  
773 contrast.



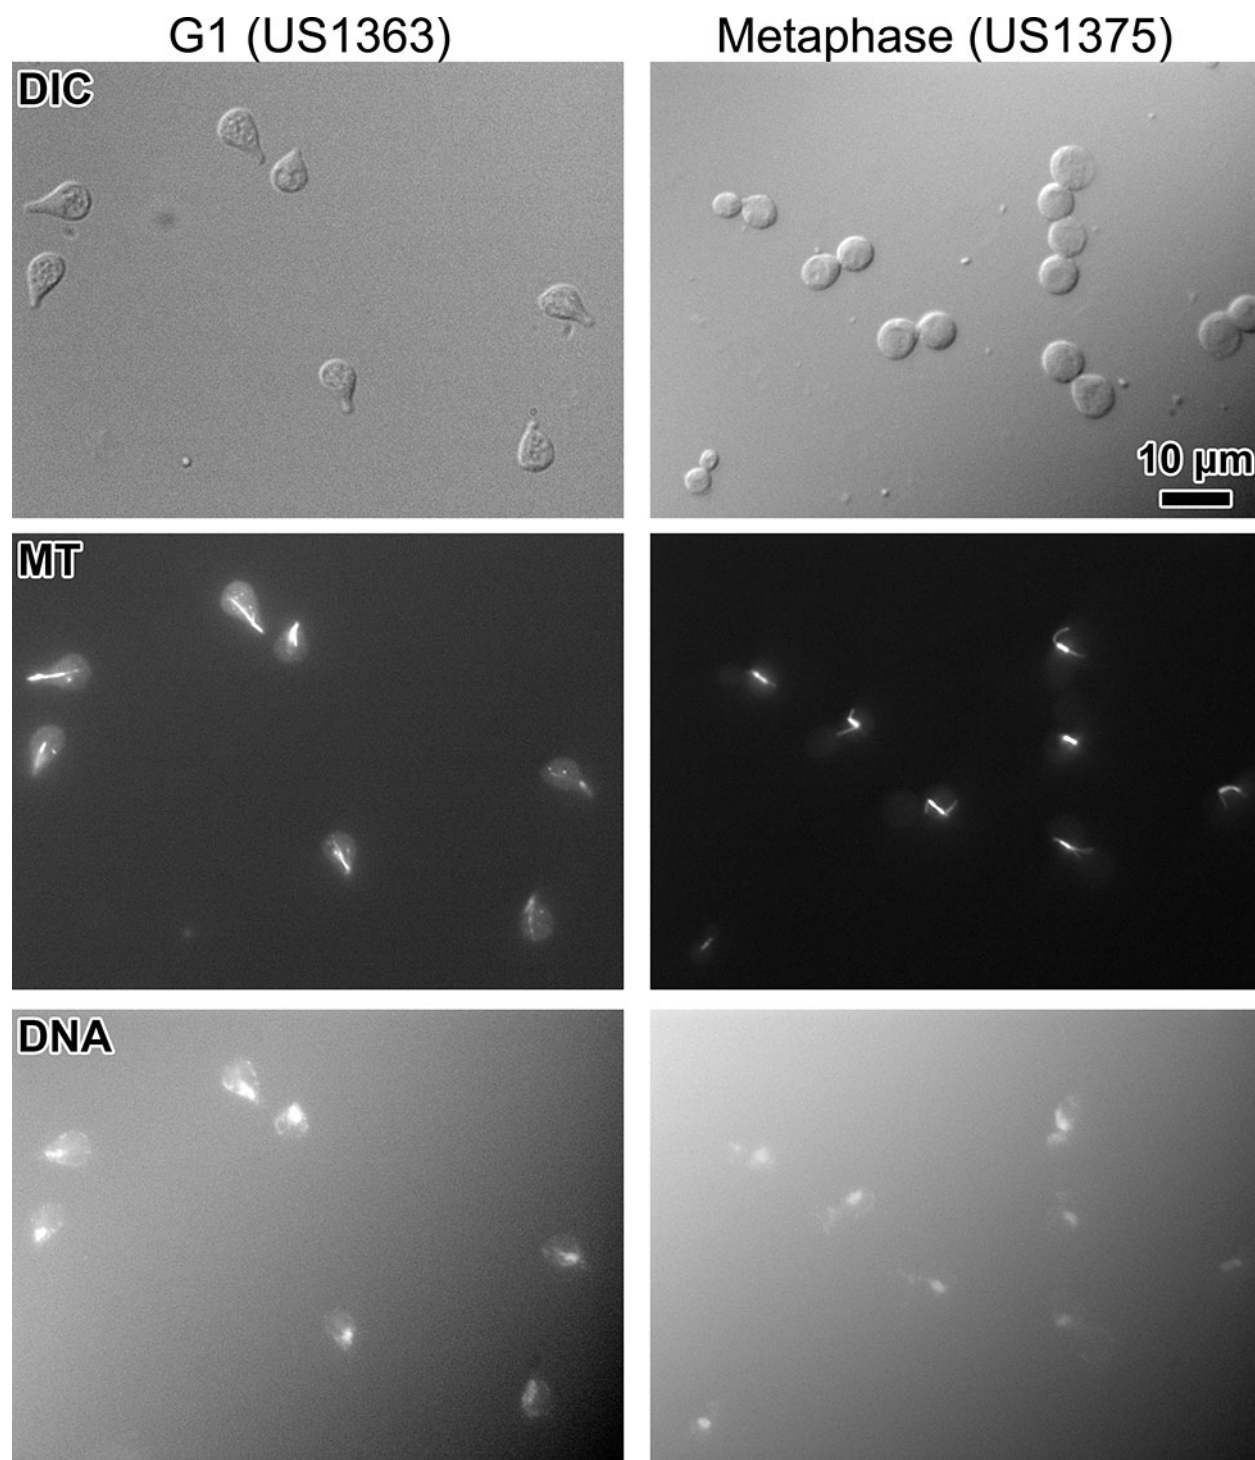

774

775 **Figure S3. Synchronization of *S. cerevisiae***

776 US1363 cells are arrested at G1 and show the characteristic “Shmoo” morphology (left

777 column) when incubated with  $\alpha$ -factor; *cdc20* $\Delta$  *GAL-CDC20* (US1375) mutants are

778 arrested at metaphase in presence of glucose. These metaphase cells have a  
779 characteristic large-bud morphology and a short, bar-shaped spindle (right column).  
780



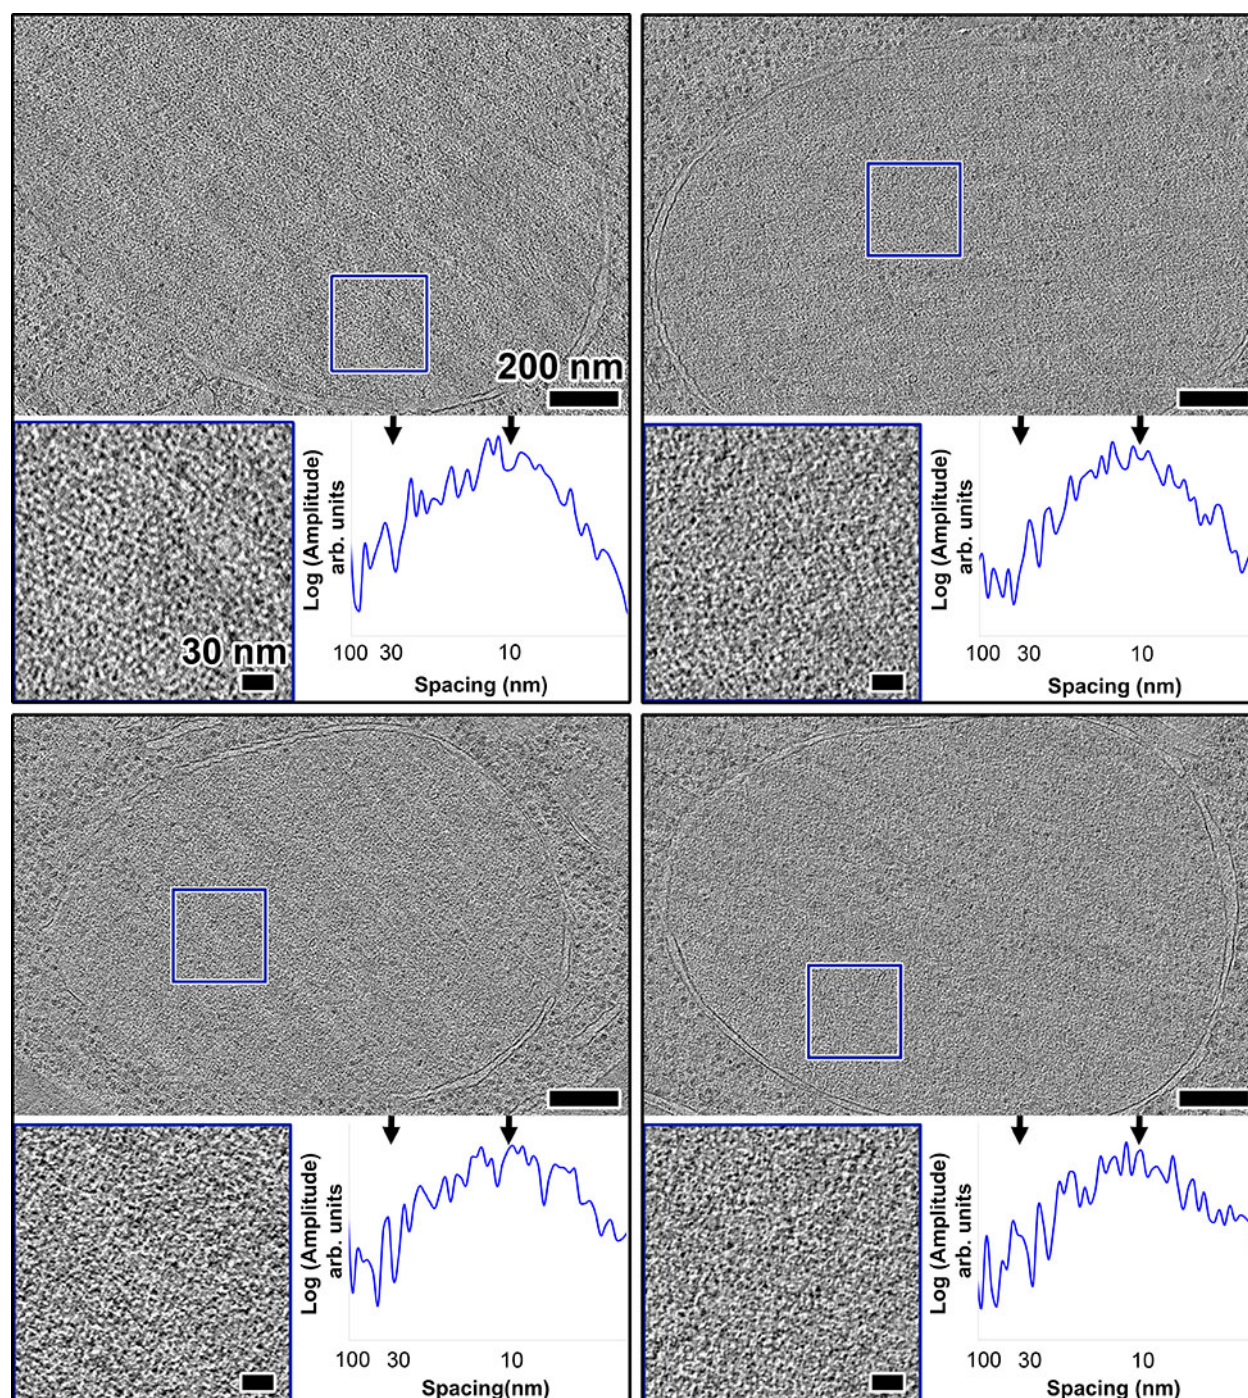

781

782 **Figure S4A. Additional examples of G1-arrested cells**

783 Tomographic slices (30-nm thick) of four more G1 cells. The lower left subpanel is a 3-

784 fold enlargement of the area boxed in blue. The lower right subpanel shows a

785 rotationally averaged power spectrum of this area. Arrows indicate 30- and 10-nm

786 spacings.



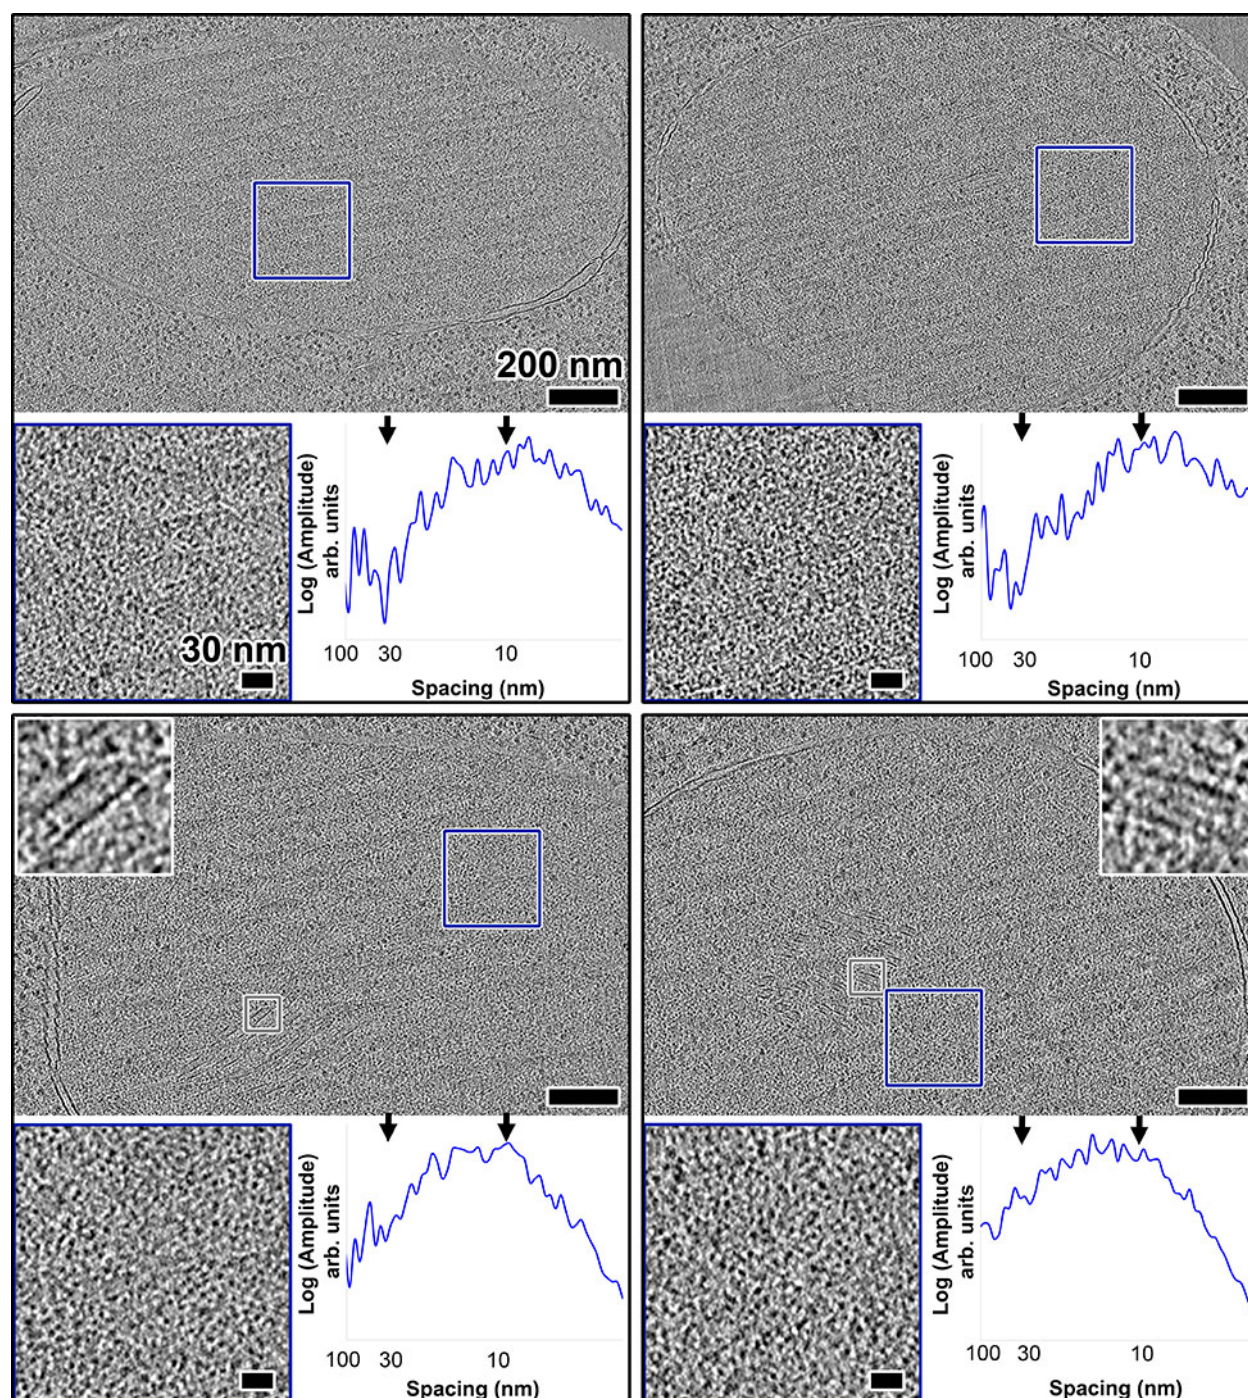

787

788 **Figure S4B. Additional examples of metaphase-arrested cells**

789 Tomographic slices (30-nm thick) of four more metaphase cells. The lower left subpanel

790 is a 3-fold enlargement of the area boxed in blue. The lower right subpanel shows a

791 rotationally averaged power spectrum of this area. Arrows indicate 30- and 10-nm



792 spacings. For the two cells in the lower panels, the upper subpanels show spindle  
793 microtubules, boxed in grey and enlarged 5-fold.  
794

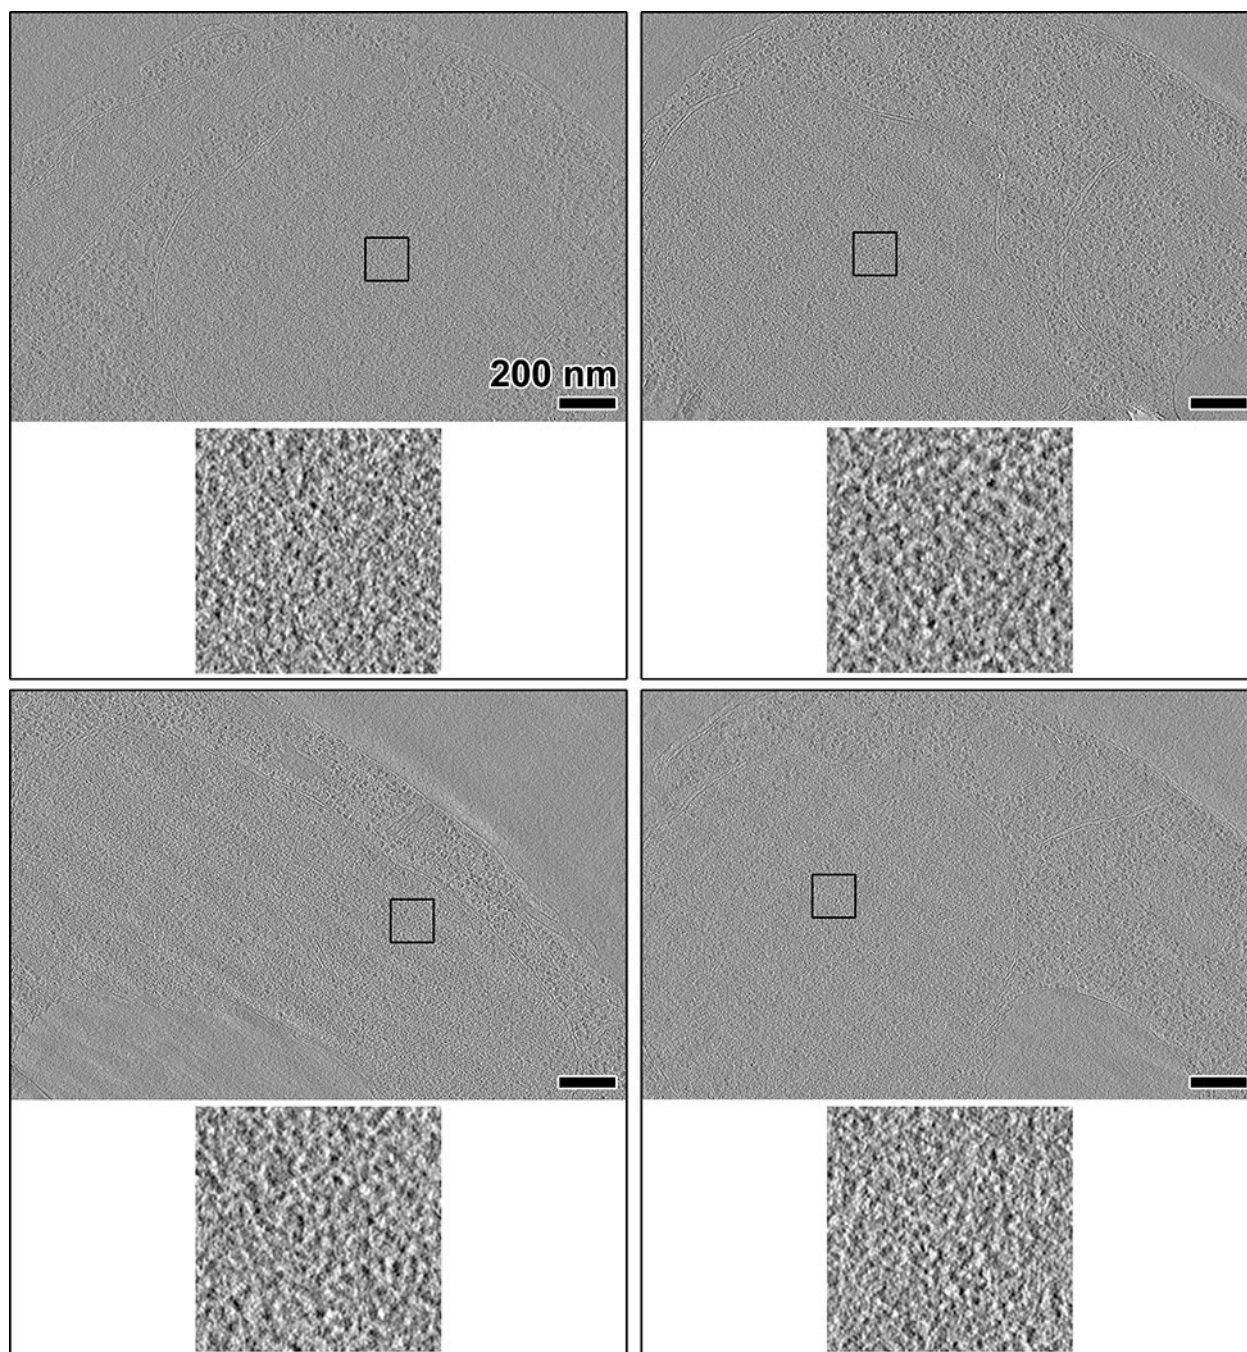

795

796 **Figure S4C. Additional examples of formaldehyde-fixed cells**

797 Tomographic slices (10-nm thick) of four more wild-type cells, fixed in formaldehyde. A  
798 region inside each nucleus is boxed out and enlarged 6-fold in the lower subpanel.

799



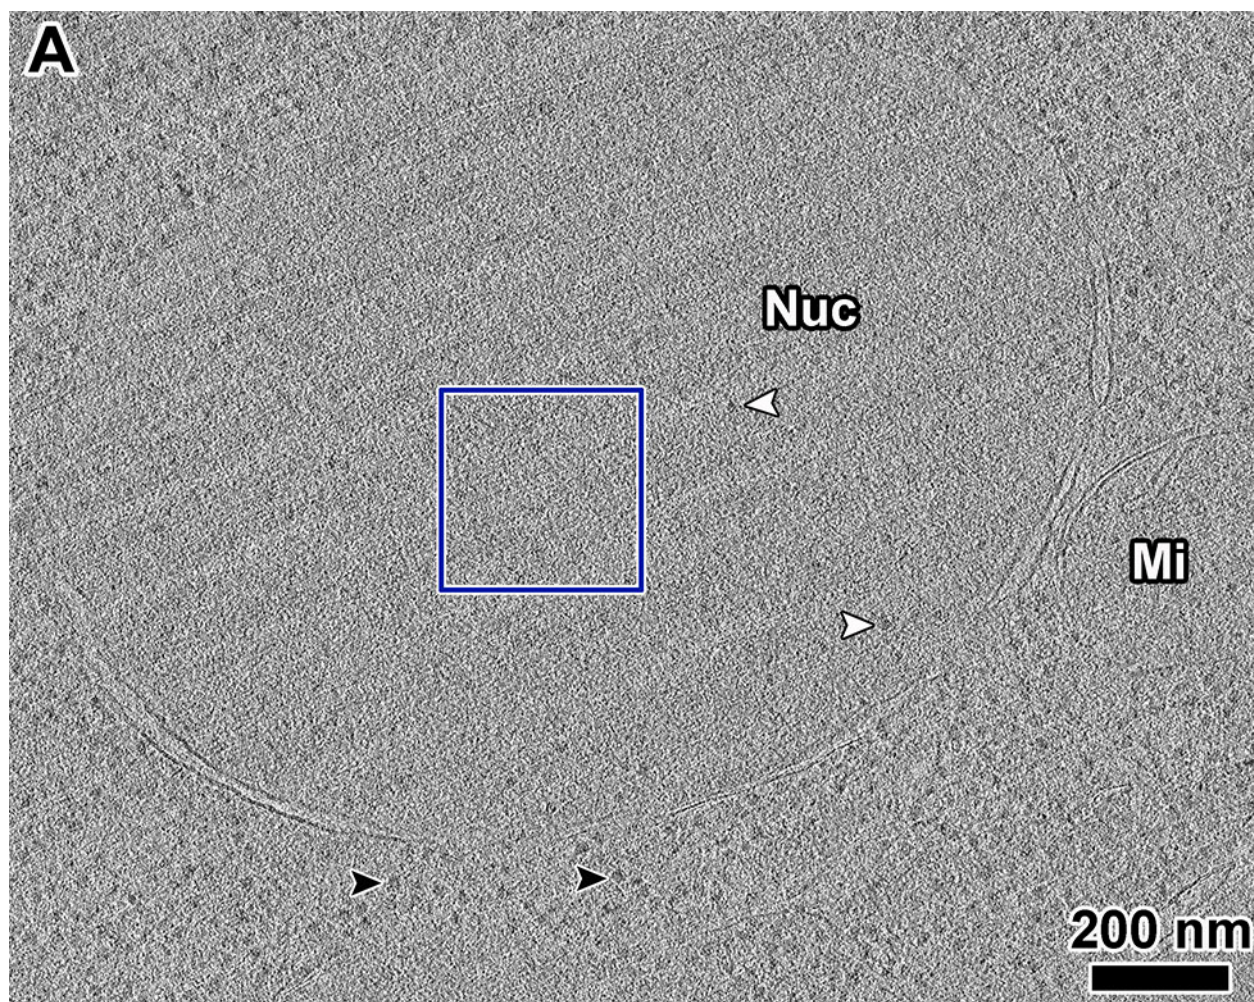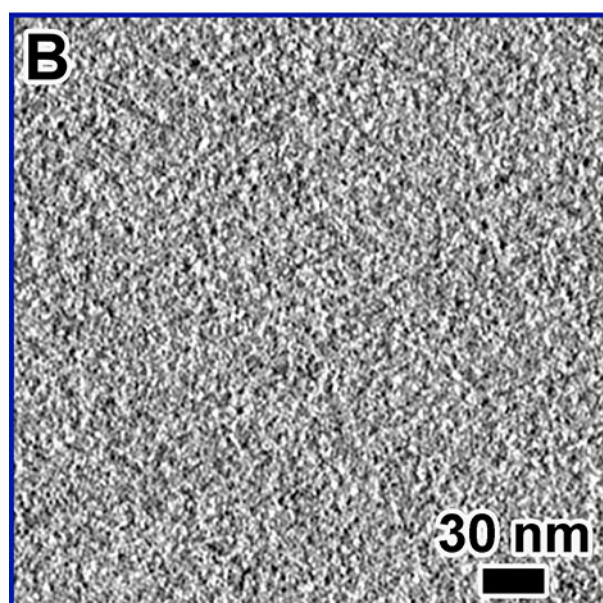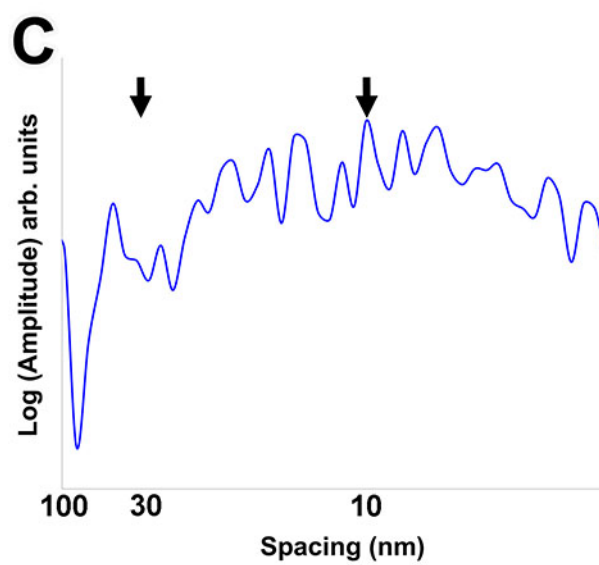

800

801 **Figure S5. Chromatin fiber signals are absent regardless of imaging conditions**

802 **(A)** Tomographic slice (30-nm thick) of a nucleus in a G1-arrested cell that was imaged  
803 much closer to focus ( $-3\ \mu\text{m}$ ) than the other cells presented in this paper. The nucleus  
804 (Nuc) and a mitochondrion (Mi) are labeled. White arrows: intranuclear ribosome-sized  
805 densities; black arrows: cytoplasmic ribosome densities. **(B)** A 3-fold enlargement of the  
806 intranuclear position boxed in panel (A). **(C)** Rotationally averaged power spectrum of  
807 (B). Arrows point to 30- and 10-nm spacings.  
808

809 **Table S1. Tomogram details**

| ID               | Figure               | Sample | Method | Dose<br>(e/Å <sup>2</sup> ) | Defocus<br>(μm) |
|------------------|----------------------|--------|--------|-----------------------------|-----------------|
| 15apr11_chrom_01 | 1A,B                 | F      | PF     | 100                         | -6              |
| 15may29_chrom_19 | 1C,D                 | F      | PF     | 100                         | -6              |
| 15apr29_chrom_15 | 1E,F                 | F      | VS     | 100                         | -10             |
| 15mar02a__070    | 2A,C,D               | G1     | VS     | 100                         | -8              |
| 14oct01a__027    | 2B,E,F +<br>Movie S1 | M      | VS     | 100                         | -10             |
| 15mar02a__074    | 3A,B,C,D             | G1     | VS     | 100                         | -8              |
| 14oct01a__032    | 3E,F,G,H             | M      | VS     | 100                         | -8              |
| 15oct12_yeast_12 | 4A,B                 | G1     | VS     | 100                         | -8              |
| 16jan29_yeast_10 | 4C,D                 | UF     | VS     | 100                         | -12             |
| 15mar02a_065     | 5A,B                 | G1     | VS     | 100                         | -11             |
| 15apr11_chrom_01 | S2A                  | F      | PF     | 100                         | -6              |
| 15apr11_chrom_02 | S2A                  | F      | PF     | 100                         | -6              |
| 15may29_chrom_11 | S2B                  | F      | PF     | 100                         | -8              |
| 15may29_chrom_15 | S2B                  | F      | PF     | 100                         | -6              |



|                  |     |    |    |     |     |
|------------------|-----|----|----|-----|-----|
| 15may29_chrom_21 | S2B | F  | PF | 100 | -6  |
| 15apr29_chrom_32 | S2C | F  | VS | 100 | -10 |
| 15may05_chrom_07 | S2C | F  | VS | 100 | -10 |
| 15mar02a__046    | S4A | G1 | VS | 100 | -8  |
| 15oct12_yeast_02 | S4A | G1 | VS | 100 | -6  |
| 15oct12_yeast_03 | S4A | G1 | VS | 100 | -4  |
| 15oct12_yeast_04 | S4A | G1 | VS | 100 | -4  |
| 14oct01a__014    | S4B | M  | VS | 100 | -10 |
| 14oct01a__021    | S4B | M  | VS | 100 | -10 |
| 14oct01a__052    | S4B | M  | VS | 100 | -8  |
| 14oct01a__067    | S4B | M  | VS | 100 | -8  |
| 16jan29_yeast_01 | S4C | UF | VS | 100 | -8  |
| 16jan29_yeast_05 | S4C | UF | VS | 100 | -12 |
| 16jan29_yeast_09 | S4C | UF | VS | 100 | -12 |
| 16jan29_yeast_17 | S4C | UF | VS | 100 | -8  |
| 15oct12_yeast_15 | S5  | G1 | VS | 100 | -3  |

810 **ID:** Legion data ID for data collected by Leginon or manually assigned ID for data  
811 collected by FEI Tomo.

812 **Sample:** (M) metaphase-arrested yeast; (G1) G1-arrested yeast; (UF) unsynchronized  
813 and formaldehyde-fixed yeast; (F) purified chicken erythrocyte chromatin.  
814 **Method:** (VS) vitreous sections, (PF) plunge-freezing.

815 **Table S2. Cryotomography imaging conditions**

| Sample                   | Purified chromatin        | <i>S. cerevisiae</i> cells                           |
|--------------------------|---------------------------|------------------------------------------------------|
| EM grid                  | CF-22-2C-T (Protochips)   | CF-42-2C-T (Protochips) /<br>continuous carbon (EMS) |
| Microscope               |                           | Titan Krios                                          |
| Energy                   |                           | 300 keV                                              |
| Gun type                 |                           | FEG                                                  |
| Camera                   | Falcon II Direct Detector | Falcon I or II Direct Detector                       |
| Tomography software      | FEI TOMO 3 and 4          | Leginon                                              |
| Calibrated magnification | 23986                     | 15678 / 19167                                        |
| Calibrated pixel size    | 5.84 Å                    | 8.93 / 7.47 Å                                        |
| Defocus                  | -6 to -8 µm               | -3 to -15 µm                                         |
| Cumulative dose          |                           | 80 - 100 electrons / Å <sup>2</sup>                  |
| Dose fractionation       |                           | 1/cos                                                |
| Tilt range               |                           | ±60°                                                 |
| Tilt increment           |                           | 2°                                                   |
